# Supplementary material
Source: HighWire-hosted journal article supplement (https://www.cmajopen.ca/highwire/filestream/89984/field_highwire_adjunct_files/2/open-2022-0113-original-submission.pdf)
Supplement: open-2022-0113-original-submission.pdf [file open-2022-0113-original-submission.pdf]

1  
2  
3 **Reasons for not using HIV PrEP and strategies that may facilitate HIV PrEP uptake in Ontario and**  
4 **British Columbia among gay, bisexual and other men who have sex with men**  
5  
6  
7

8 **AUTHORS**  
9

10 Oscar Javier Pico-Espinosa, MD MSPH PhD, **St Michael's Hospital, Toronto, ON, Canada**

11 Mark Hull, MD MHSc FRCPC, **BC Centre for Excellence in HIV/AIDS, Vancouver, BC, Canada,**  
12 **University of British Columbia, Vancouver, BC, Canada.**

13 Paul MacPherson MD FRCPC PhD, **University of Ottawa, Ottawa, ON, Canada**

14 Daniel Grace PhD, **University of Toronto, Toronto, ON, Canada**

15 Nathan Lachowsky, PhD, **University of Victoria, Victoria, BC, Canada**

16 Mark Gaspar PhD, **University of Toronto, Toronto, ON, Canada**

17 Saira Mohammed BHE MSc CCRP, **BC Centre for Excellence in HIV/AIDS, Vancouver, BC, Canada**

18 Robinson Truong BSc, **St Michael's Hospital, Toronto, ON, Canada**

19 Darrell H. S. Tan MD FRCPC PhD, **St Michael's Hospital, Toronto, ON, Canada**  
20  
21  
22

23 **Corresponding author**  
24

25 Oscar Javier Pico-Espinosa

26 Oscarjavier.picoespinosa@unityhealth.to

27 Li Ka Shing Knowledge Institute, St. Michael's Hospital.

28 209 Victoria Street, Toronto

29 M5B 18T, ON  
30  
31  
32  
33  
34  
35  
36  
37  
38  
39  
40  
41  
42  
43  
44  
45  
46  
47  
48  
49  
50  
51  
52  
53  
54  
55  
56  
57  
58  
59  
60

## ABSTRACT

### Background

HIV Pre-exposure prophylaxis (PrEP) is underutilized. We aimed to identify barriers to PrEP use and strategies that may facilitate its uptake.

### Methods

Gay, bisexual and other men who have sex with men 19 years or older living in Ontario and British Columbia, Canada, completed a cross-sectional survey in 2019/2020. Participants who met Canadian PrEP guideline criteria and not already using PrEP identified relevant barriers and which strategies would make them more likely to start PrEP. We described such barriers and strategies separately for Ontario and British Columbia.

### Results

Of 1527 survey responses, 261 who never used PrEP and met criteria for PrEP were included. In Ontario, the most common barriers were affordability (43%) and concern about side effects (42%). In British Columbia, the most common reasons were concern about side effects (41%) and not feeling at high enough risk (36%). In Ontario, preferred strategies were: short waiting time (63%), the healthcare provider informing about their HIV risk being higher than perceived (62%) and a written step-by-step guide (60%). In British Columbia, strategies were: short waiting time (68%), people speaking publicly about PrEP (68%) and their healthcare provider counselling about: their HIV risk being higher than perceived (64%), side effects of PrEP (65%) and about how well PrEP works (62%).

### Conclusions

Concern about side effects and not self-identifying as high risk for HIV were common barriers. Shorter waiting times may increase PrEP uptake. In Ontario, the findings suggested lack of affordability. In British Columbia, strategies involving healthcare providers were valued.

**Key words:** HIV Pre-exposure prophylaxis, prevention, men who have sex with men, gender and sexual minorities, accessibility of health services.

## INTRODUCTION

HIV pre-exposure prophylaxis (PrEP) using tenofovir disoproxil fumarate/emtricitabine (TDF/FTC) is highly effective at reducing the risk of HIV infection[1-3] and has been approved for daily use in Canada since 2016. However, despite a significant increase in the number of PrEP users in the past years[4, 5], that is still far below the estimated number of people who could benefit from PrEP.[6, 7] Barriers to PrEP uptake exist at the individual, interpersonal, community and structural level.[8] At the individual level, lack of awareness, perceived lack of efficacy, concern about side effects and low HIV risk perception are common. At the interpersonal level, there is fear of risk compensation (increase in risk-taking behaviors as a result of a decrease in perceived risk) and stigma from peers, family and friends. At the community level, barriers include mistrust of the pharmaceutical industry and medical establishment, and inadequate access to health care providers experienced in working with sexual or gender minorities. In addition, providers' lack of awareness or training, lack of referral pathways, concern about risk compensation, and concern about patient adherence can be barriers.[9, 10] Finally, at the structural level, issues of affordability as it is the case in Ontario where PrEP is not fully funded, institutionalized racism/discrimination and structural stigma play a major role in the disparate access to and limited uptake of PrEP. [8, 11-18]

All such barriers are potentially modifiable, with some requiring more individual-focused actions such as education/health promotion with individuals whom could benefit from PrEP, and others operating at the policy level such as full public funding for PrEP. To decide what methods and strategies could help individuals at risk of HIV access PrEP, it is necessary to describe the key determinants and/or the barriers to access and use. Relevant methods could be empowerment, improving perceived relevance, influencing the reference group or redesign of services[19-21]; and the strategies that can translate such methods into actions include counselling, peer education, information provision, having role models, and the availability of guides, among others.[19-21] An important component of such intervention planning is to consider end users' (in this case, potential PrEP users) preferences regarding what strategies might have an impact on their decision to initiate PrEP. The aims of this analysis were to identify the barriers to PrEP use among GBM who have never used PrEP who met Canadian guideline criteria[6], to identify strategies most likely to influence GBM nonusers' decision to start PrEP and to explore differences between Ontario and British Columbia.

## METHODS

The PrEP implementation project (PRIMP) is a multicomponent PrEP Implementation study investigating strategies for increasing PrEP uptake among urban GBM in Ontario and British Columbia, Canada. One component is an open voluntary cross-sectional survey, which recruited participants from: Toronto, Ottawa and Hamilton in Ontario; and Vancouver and Victoria in British Columbia. These cities were selected because they are the largest urban centers in the two largest English speaking provinces in Canada, as well as because of their differential medication coverage policies: PrEP is universally covered in British Columbia but not in Ontario. Potential participants were recruited via various means, including English-language posters and information cards distributed in sexual health clinics, advertisements on popular GBM dating apps, and via social media (Facebook and dating apps) promotion by collaborating community organizations. Responses were automatically stored into a database and questions were adapted based on responses to other items.

1  
2  
3 Inclusion criteria were being age 19 years or older, identifying as cisgender man, transgender man or  
4 transgender woman, being able to communicate in English, reported MSM sexual behavior in the past  
5 six months and provided consent. Volunteers or employees of any community health services  
6 organization were excluded. Recruitment took place between July 2019 and August 2020.  
7

8  
9 The survey included questions about sociodemographic variables and sexual health. The survey was  
10 previously tested for usability and technical functionality, and allowed to navigate back and forth. Self-  
11 reported sexual health variables as per the Canadian guideline criteria for PrEP[6] were asked to  
12 determine PrEP eligibility for the present analysis. Such criteria consist of condomless anal sex in the  
13 past six months plus any of the following: infectious syphilis, rectal gonorrhoea, rectal chlamydia,  
14 repeated use of non-occupational post-exposure prophylaxis [nPEP], or scoring  $\geq 11$  on the High  
15 Incidence Risk Index for Men Who Have Sex with Men (HIRI-MSM)[22]. We did not collect information  
16 about the viral load status of respondents' partners who were living with HIV. We also asked never PrEP  
17 users about their reasons for not using PrEP and what strategies would influence their decision to start  
18 PrEP from a list of possible barriers and strategies respectively, based on previous experience working  
19 with GBM trying to access PrEP (see appendix 1).  
20  
21

22  
23 Data are presented for the entire study sub-sample and stratified by province. For continuous variables,  
24 mean and standard deviation or median and interquartile range are presented depending on their  
25 distribution. Categorical data are presented as proportions. We analyzed all available data. Differences  
26 between provinces were tested using the Chi-square or Fisher's exact test for categorical variables, or  
27 with t-tests or Wilcoxon rank-sum tests for continuous variables. We did post-hoc analyses to explore  
28 the reasons for not using PrEP and the strategies to increase PrEP uptake stratified by level of formal  
29 education and ethnicity. Examining these subgroups is relevant considering differential HIV rates and  
30 PrEP uptake in Canada and in other settings, as data shows that Black, Latinx and indigenous are at a  
31 more disadvantaged position.[23-26]  
32  
33

34  
35 Sample size for the overall PRIMP survey was calculated based on previous surveys on PrEP awareness,  
36 acceptability and usage[27, 28]. This resulted in a sample size of 250 participants in each city (1250 in  
37 total) to estimate these proportions with adequate precision. However, the present analyses include  
38 only never PrEP users who meet criteria for PrEP according to the Canadian PrEP guideline.[6] This study  
39 was reviewed and approved by the Research Ethics Boards of Clinical Trials Ontario, Unity Health  
40 Toronto, University Health Network, Toronto Public Health, University of Toronto, York Region,  
41 University of British Columbia and University of Victoria. (REB 18-346). Study data are securely stored at  
42 password protected server at St. Michael's Hospital in Toronto. Participants were offered a \$10 CAD gift  
43 card as compensation for their time.  
44  
45  
46  
47

## 48 RESULTS

49  
50 In total, 260 participants were included in this analysis; 184 from Ontario and 76 from British Columbia  
51 (Figure 1). The median age was 31 years (IQR: 26-38) and 61% had at least a Bachelor's degree. In both  
52 provinces, most were White (57%). Private drug insurance (59%) and out of pocket (27%) were the most  
53 common forms of paying for medications (Table 1).  
54

55 -FIGURE 1-  
56  
57  
58  
59  
60

1  
2  
3  
4  
5 -TABLE 1-

6  
7 Descriptive and comparative analyses of PrEP eligibility are shown in Table 2. Participants were PrEP  
8 eligible based on a prior bacterial STI diagnosis (syphilis, rectal gonorrhoea and/or rectal chlamydia) in 99  
9 (38% of the sample), prior recurrent PEP use in 15 (6%), and HIRI score  $\geq 11$  in 256 (98%).

10  
11 -TABLE 2-

12  
13 In Ontario, the most common reasons for not using PrEP was cost (43%), unlike BC where cost was  
14 reported as a barrier by 16% ( $p < 0.001$ ) (Table 3). Other common reasons were: concern about side  
15 effects (42% in Ontario and 41% in BC) and not feeling at high enough risk (27% in Ontario and 36% in  
16 BC). Unwillingness to take a pill regularly was also common in BC (24%) (Table 3).

17  
18 -TABLE 3-

19  
20 Strategies that might influence participants' decision to start PrEP are shown in table 4. In Ontario, these  
21 were short waiting time (63%), healthcare providers informing them about their HIV risk being higher  
22 than perceived (62%) and a written step-by-step guide on how to access PrEP (60%). In British Columbia,  
23 these were short waiting time (68%), people speaking publicly about PrEP (68%) and their healthcare  
24 provider counselling them about: their HIV risk being higher than perceived (64%), side effects of PrEP  
25 (65%) and about how well PrEP works (62%).

26  
27 -TABLE 4-

28  
29 In the post-hoc analyses, being unable to afford PrEP was more common among participants with less  
30 than a Bachelor's degree (43%) compared with those with at least a Bachelor's degree (31%,  $p=0.049$ ).  
31 In contrast, not feeling at high enough risk was less common (21% vs 34%,  $p: 0.019$ ). (Table S1).  
32 Likewise, Latinx, South Asian and Middle Eastern indicated affordability as one of the main barriers for  
33 PrEP uptake slightly more often than other groups ( $p: 0.052$ ). Furthermore, participants with less than a  
34 Bachelor's degree were less likely to identify any of the listed reasons (see table 4) as strategies that  
35 would influence their decision to start PrEP (Table S2).

36  
37  
38  
39 **DISCUSSION**

40  
41 In this community-based sample of GBM in five large cities in Ontario and British Columbia, we found  
42 that a third of those meeting evidence-based criteria for PrEP initiation had never used it. Concern about  
43 side effects, affordability and not feeling at high enough risk were the most common barriers to PrEP  
44 uptake. Short waiting time was the most preferred strategy to increase PrEP uptake; other strategies  
45 included healthcare providers informing clients about their HIV risk being higher than perceived,  
46 counselling side effects of PrEP and about how well PrEP works; written guides; and people speaking  
47 publicly about PrEP. The largest observed difference between the provinces was affordability as a  
48 reason for not using PrEP.

49  
50 In Ontario, 43% of participants identified cost as a reason for not accessing PrEP (in contrast to 16% in  
51 BC). While PrEP is listed on Ontario's public drug formulary, there are both administrative and financial  
52 barriers to accessing this formulary[29], such that only 23% of PrEP users in the province access it  
53 through this mechanism[4]. In contrast, in British Columbia, PrEP is publicly funded if clinical criteria  
54  
55  
56  
57  
58  
59  
60

1  
2  
3 based on the Canadian guideline for PrEP are met,[30] making it one of only a few provinces/territories  
4 in Canada where PrEP is fully funded.[30-33] Nevertheless, affordability was cited as a barrier to PrEP  
5 uptake in 16% of British Columbia respondents, possibly due to reasons related to immigration status,  
6 costs associated with accessing the medication (e.g. travel) or inter-provincial portability policies.  
7 Universal PrEP access across Canada is urgently required to address this fundamental barrier to health  
8 equity.  
9

10  
11 Concern about side effects was the most common reason for not using PrEP in the overall sample. This  
12 finding suggests that more public education is required regarding PrEP's generally favourable side effect  
13 profile, perhaps emphasizing that the most common regimen of PrEP, TDF/FTC, does not carry a risk of  
14 serious adverse events higher than placebo. [1-3] in this regard, the main tolerability issue associated  
15 with PrEP is gastrointestinal upset which tends to be mild and resolves spontaneously within the first  
16 month.[34] In addition, although more long-term data are needed, it is known the asymptomatic renal  
17 and bone toxicities of FTC-TDF include slight elevations in creatinine and modest decreases in bone  
18 mineral density that are generally reversible with drug discontinuation, and can generally be monitored  
19 and managed clinically.[1, 34-37] The side effect profile is similar for on demand FTC-TDF (two pills prior  
20 to sexual activity and one pill per day for two days after).[3] Furthermore, a more recent form of PrEP,  
21 Emtricitabine and tenofovir alafenamide (TAF-FTC) has shown a slightly better safety profile than FTC-  
22 TDF in terms of creatinine levels and bone density.[2] While concerns about side effects might be  
23 mitigated by providing more information about PrEP, the collective memory of side effects related to  
24 HIV treatment and medical mistrust might be important contributing factors to such concerns.[15, 16]  
25 Creative interventions that go beyond traditional patient education may thus be needed to overcome  
26 these barriers.  
27  
28  
29  
30

31 Not feeling at high enough risk was common among the study participants. While some of the non-users  
32 are in fact at low risk of HIV infection, including those in monogamous relationships or in those with  
33 consistent condom use,[6, 38] many GBM may underestimate their risk.[6] This misalignment between  
34 the potential user's and the clinician's perspectives has been previously described in the literature as  
35 one of the main barriers to PrEP uptake,[39] but requires deeper study.  
36  
37

38 Participants in both provinces reported that short waiting times might increase their chances of starting  
39 PrEP. Our data shows that the median waiting time from the moment a person decides to go on PrEP  
40 until they get a prescription ranges between seven days and two months.[40] Further, potential users  
41 might feel discouraged if they cannot access PrEP directly from their primary care provider, especially if  
42 there is already some hesitancy to start PrEP. While not without limitations, interventions such as  
43 telemedicine or decentralization of access to PrEP through engagement of other healthcare  
44 professionals, pharmacists, HIV testing sites or community organizations could reduce waiting times.[41]  
45  
46

47 In British Columbia, a large proportion of participants reported that having their healthcare provider  
48 informing them about how well PrEP works, counselling them about side effects and informing them  
49 about their HIV risk being higher than perceived would positively influence their decision to start PrEP.  
50 The latter was also commonly reported in Ontario. This indicates that strategies aiming to improve PrEP  
51 uptake must engage health care providers. Importantly, informing high-risk MSM of their calculated risk  
52 as a stand-alone intervention rather than in the context of a visit to a provider, is not sufficient to  
53 increase PrEP uptake[42], suggesting that successful strategies should be multicomponent. Providers  
54 should follow a personalized approach: acknowledge patient's sexual behaviors, assess and address  
55  
56  
57  
58  
59  
60

1  
2  
3 potential users' concerns, come up with a joint risk-reduction plan, and provide follow-up. Short  
4 interventions containing some of these elements have been associated with an increase in providers'  
5 abilities to discuss HIV prevention at HIV clinics.[43] If written guides about accessing PrEP are used,  
6 information about how HIV risk is assessed and when an individual should consider PrEP could be  
7 included. Our findings indicated the need for more innovative social marketing strategies. People  
8 speaking publicly about PrEP, and messaging about PrEP on social media and other channels using digital  
9 platforms could perhaps include information about risk self-assessment too.  
10  
11

12 In the post-hoc analyses, we observed signs of disparities depending on level of formal education and  
13 ethnicity. Latinx, south Asian and Middle Eastern reported cost as a barrier more often than other ethnic  
14 groups and more often than other barriers. Furthermore, those with education levels lower than a  
15 Bachelor's degree reported lower acceptability of almost all listed strategies to influence their decision  
16 to start PrEP.  
17  
18

19 Our study has limitations. Our findings may not be generalizable to smaller urban centers or rural areas,  
20 where other types of barriers may be more relevant. However, introducing universally funded PrEP for  
21 eligible individuals may result in increased PrEP uptake in both urban and rural areas, considering that  
22 affordability was selected as one of the main barriers. Similarly, short waiting times and healthcare  
23 providers able to inform about different aspects of PrEP might also have a positive effect in various  
24 settings. In addition, participants were recruited from sexual health clinics and through advertisements  
25 on specific internet platforms, meaning that our results might not be representative of people not  
26 engaged in care and/or less active on social media, who possibly experience more difficulties accessing  
27 PrEP or information about PrEP. We do not believe that providing compensation for participating in the  
28 survey had a large influence on the final sample as we do not believe the honorarium provided had an  
29 important impact on accepting risks derived from taking the survey that they would not have accepted  
30 otherwise. Finally, our study was not sufficiently powered to identify differences between subgroups;  
31 however, we observed indications of differences in the role of affordability based on ethnicity and  
32 acceptability of strategies to increase PrEP uptake based on level of formal education.  
33  
34  
35  
36  
37  
38

## 39 **CONCLUSIONS**

40 Concern about side effects and not feeling at high enough risk were common barriers in both provinces.  
41 In Ontario, the findings suggested structural issues such as affordability and accessibility. In British  
42 Columbia, strategies involving healthcare providers were often valued. Future interventions must  
43 consider barriers on various levels, including potential users' knowledge and attitudes towards PrEP, the  
44 capacity of healthcare providers to provide information and prescribe PrEP and what policies for  
45 medication coverage are in place.  
46  
47

## 48 **ACKNOWLEDGEMENTS**

49 This project received funding from the Canadian Institutes of Health Research (CIHR). DHST is supported  
50 by a Tier 2 Canada Research Chair in HIV Prevention and STI Research. DG is supported by a Canada  
51 Research Chair in Sexual and Gender Minority Health.  
52  
53

54 We acknowledge that the land where this research took place is the traditional territory of many nations  
55 and is now home to many diverse First Nations, Inuit and Métis peoples.  
56  
57  
58  
59  
60

## REFERENCES

1. Grant, R., et al., *Preexposure chemoprophylaxis for HIV prevention in men who have sex with men*. New England Journal of Medicine, 2010(363): p. 2587-99.
2. Mayer, K.H., et al., *Emtricitabine and tenofovir alafenamide vs emtricitabine and tenofovir disoproxil fumarate for HIV pre-exposure prophylaxis (DISCOVER): primary results from a randomised, double-blind, multicentre, active-controlled, phase 3, non-inferiority trial*. The Lancet, 2020. **396**(10246): p. 239-254.
3. Molina, J.M., et al., *On-Demand Preexposure Prophylaxis in Men at High Risk for HIV-1 Infection*. N Engl J Med, 2015. **373**(23): p. 2237-46.
4. Tan, D.H.S., et al., *Trends in HIV pre-exposure prophylaxis uptake in Ontario, Canada, and impact of policy changes: a population-based analysis of projected pharmacy data (2015-2018)*. Can J Public Health, 2021. **112**(1): p. 89-96.
5. Popovic, N., Q. Yang, and C. Archibald, *Trends in HIV pre-exposure prophylaxis use in eight Canadian provinces, 2014-2018*. Can Commun Dis Rep, 2021. **47**(56): p. 251-258.
6. Tan, D.H.S., et al., *Canadian guideline on HIV pre-exposure prophylaxis and nonoccupational postexposure prophylaxis*. CMAJ, 2017. **189**(47): p. E1448-E1458.
7. Tan, D.H., et al. *Estimating the number of gay, bisexual and other men who have sex with men (gbMSM) eligible for HIV preexposure prophylaxis (PrEP) in Ontario*. in *26th Annual Canadian Conference on HIV/AIDS Research*. 2017. Montreal, Quebec.
8. Philbin, M.M., et al., *The Promise of Pre-Exposure Prophylaxis for Black Men Who Have Sex with Men: An Ecological Approach to Attitudes, Beliefs, and Barriers*. AIDS Patient Care STDS, 2016. **30**(6): p. 282-90.
9. Zhang, C., et al., *HIV Pre-Exposure Prophylaxis Implementation Cascade Among Health Care Professionals in the United States: Implications from a Systematic Review and Meta-Analysis*. AIDS Patient Care STDS, 2019. **33**(12): p. 507-527.
10. Pleuhs, B., et al., *Health Care Provider Barriers to HIV Pre-Exposure Prophylaxis in the United States: A Systematic Review*. AIDS Patient Care STDS, 2020. **34**(3): p. 111-123.
11. Peng, P., et al., *A Global Estimate of the Acceptability of Pre-exposure Prophylaxis for HIV Among Men Who have Sex with Men: A Systematic Review and Meta-analysis*. AIDS Behav, 2018. **22**(4): p. 1063-1074.
12. Maticotta, J.J., F.J. Rosales-Perez, and C.M. Carrillo, *HIV Preexposure Prophylaxis and Treatment as Prevention - Beliefs and Access Barriers in Men Who Have Sex With Men (MSM) and Transgender Women: A Systematic Review*. J Patient Cent Res Rev, 2020. **7**(3): p. 265-274.
13. Wilton, J., et al., *Use of an HIV-risk screening tool to identify optimal candidates for PrEP scale-up among men who have sex with men in Toronto, Canada: disconnect between objective and subjective HIV risk*. J Int AIDS Soc, 2016. **19**(1): p. 20777.
14. Eaton, L.A., et al., *Stigma and Conspiracy Beliefs Related to Pre-exposure Prophylaxis (PrEP) and Interest in Using PrEP Among Black and White Men and Transgender Women Who Have Sex with Men*. AIDS Behav, 2017. **21**(5): p. 1236-1246.
15. Kimball, D., et al., *Medical Mistrust and the PrEP Cascade Among Latino Sexual Minority Men*. AIDS Behav, 2020. **24**(12): p. 3456-3461.
16. Quinn, K., et al., *"A Gay Man and a Doctor are Just like, a Recipe for Destruction": How Racism and Homonegativity in Healthcare Settings Influence PrEP Uptake Among Young Black MSM*. AIDS Behav, 2019. **23**(7): p. 1951-1963.



17. Kota, K.K., et al., *Sociodemographic Characteristics of HIV Pre-Exposure Prophylaxis Use and Reasons for Nonuse Among Gay, Bisexual, and Other Men Who Have Sex with Men from Three US Cities*. AIDS Patient Care STDS, 2021.
18. Gaspar, M., T. Salway, and D. Grace, *Ambivalence and the biopolitics of HIV pre-exposure prophylaxis (PrEP) implementation*. Soc Theory Health, 2021: p. 1-17.
19. Wight, D., et al., *Six steps in quality intervention development (6SQuID)*. J Epidemiol Community Health, 2016. **70**(5): p. 520-5.
20. Bartholomew, K.L., G.S. Parcel, and G. Kok, *Intervention Mapping: A Process for Developing Theory- and Evidence-Based Health Education Programs*. Health Education & Behavior, 1998. **25**(5): p. 545-563.
21. Campbell, N.C., et al., *Designing and evaluating complex interventions to improve health care*. BMJ, 2007. **334**: p. 455-459.
22. Smith, D.K., et al., *Development of a Clinical Screening Index Predictive of Incident HIV Infection Among Men Who Have Sex With Men in the United States*. J Acquir Immune Defic Syndr, 2012. **60**(4): p. 421-427.
23. Ontario HIV Epidemiology and Surveillance Initiative, *HIV diagnoses in Ontario, 2019*. 2021: Toronto, Ontario.
24. Lelutiu-Weinberger, C. and S.A. Golub, *Enhancing PrEP Access for Black and Latino Men Who Have Sex with Men*. J Acquir Immune Defic Syndr, 2016. **73**(5): p. 547-555.
25. Haddad, N., et al., *HIV in Canada-surveillance report, 2019*. Can Commun Dis Rep, 2021. **47**(1): p. 77-86.
26. Kanny, D., et al., *Racial/Ethnic Disparities in HIV Preexposure Prophylaxis Among Men Who Have Sex with Men — 23 Urban Areas, 2017*. MMWR Morb Mortal Wkly Rep, 2019. **68**(37): p. 801-806.
27. Lachowsky, N.J., et al., *Pre-exposure Prophylaxis Awareness Among Gay and Other Men who have Sex with Men in Vancouver, British Columbia, Canada*. AIDS Behav, 2016. **20**(7): p. 1408-22.
28. Community-Based Research Centre. *Sex Now Survey*. 2014; Available from: [https://www.cbrc.net/sex\\_now](https://www.cbrc.net/sex_now).
29. Tang, K.L., W.A. Ghali, and B.J. Manns, *Addressing cost-related barriers to prescription drug use in Canada*. CMAJ, 2014. **186**(4): p. 276-280.
30. British Columbia Centre for Excellence in HIV/AIDS, *Guidance for the use of pre-exposure prophylaxis (PrEP) afor the prevention of HIV acquisition in British Columbia*. 2019. p. 1-20.
31. Alberta Health Services, *Alberta HIV Pre-Exposure Prophylaxis (PrEP) Guidelines*, A.S.O.P.P.W. Group, Editor. 2021. p. 41.
32. Saskatchewan Health Authority. *HIV PrEP*. May 6, 2021]; Available from: <http://www.rqhealth.ca/department/population-and-public-health/hiv-prep>.
33. Government of Yukon. *Preventative human immunodeficiency virus (HIV) prescription coverage coming to Yukon*. 2020 May 6, 2021]; Available from: <https://yukon.ca/en/news/preventative-human-immunodeficiency-virus-hiv-prescription-coverage-coming-yukon>.
34. Mugwanya, K.K. and J.M. Baeten, *Safety of oral tenofovir disoproxil fumarate-based pre-exposure prophylaxis for HIV prevention*. Expert Opin Drug Saf, 2016. **15**(2): p. 265-73.
35. Yacoub, R., et al., *Elevations in Serum Creatinine With Tenofovir-Based HIV Pre-Exposure Prophylaxis: A Meta-Analysis of Randomized Placebo-Controlled Trials*. J Acquir Immune Defic Syndr, 2016. **71**(4): p. e115-8.
36. Solomon, M.M., et al., *Changes in renal function associated with oral emtricitabine/tenofovir disoproxil fumarate use for HIV pre-exposure prophylaxis*. AIDS, 2014. **28**(6): p. 851-9.
37. Glidden, D.V., et al., *Recovery of Bone Mineral Density After Discontinuation of Tenofovir-Based HIV Pre-exposure Prophylaxis*. J Acquir Immune Defic Syndr, 2017. **76**(2): p. 177-182.

- 1
- 2
- 3
- 4 38. Siegler, A.J., et al., *Levels of clinical condom failure for anal sex: A randomized cross-over trial*. *EClinicalMedicine*, 2019. **17**: p. 100199.
- 5
- 6 39. Wilton, J., S. Mishra, and D.H. Tan, *Considerations for Using the HIRI-MSM Screening Tool to*  
7 *Identify MSM Who Would Benefit Most From PrEP*. *J Acquir Immune Defic Syndr*, 2017. **76**(2): p.  
8 e58-e60.
- 9 40. Pico Espinosa, O.J., et al. *First impressions matter: Differences in experiences with first PrEP*  
10 *related healthcare encounters between gay, bisexual and other men who have sex with men*  
11 *(GBM) on PrEP and GBM who discontinued PrEP*. in *CAHR*. 2022. Online.
- 12 41. Sullivan, P.S., et al., *Implementation Strategies to Increase PrEP Uptake in the South*. *Curr*  
13 *HIV/AIDS Rep*, 2019. **16**(4): p. 259-269.
- 14 42. Blumenthal, J., et al., *Perceived Versus Calculated HIV Risk: Implications for Pre-exposure*  
15 *Prophylaxis Uptake in a Randomized Trial of Men Who Have Sex With Men*. *J Acquir Immune*  
16 *Defic Syndr*, 2019. **80**(2): p. e23-e29.
- 17 43. Thrun, M., et al., *Improved prevention counseling by hiv care providers in a Multisite, clinic-*  
18 *based intervention: positive steps*. *AIDS Education and Prevention*, 2009. **21**(1): p. 55–66.
- 19
- 20
- 21
- 22
- 23
- 24
- 25
- 26
- 27
- 28
- 29
- 30
- 31
- 32
- 33
- 34
- 35
- 36
- 37
- 38
- 39
- 40
- 41
- 42
- 43
- 44
- 45
- 46
- 47
- 48
- 49
- 50
- 51
- 52
- 53
- 54
- 55
- 56
- 57
- 58
- 59
- 60

Confidential

Figure 1. Flowchart of survey participants.

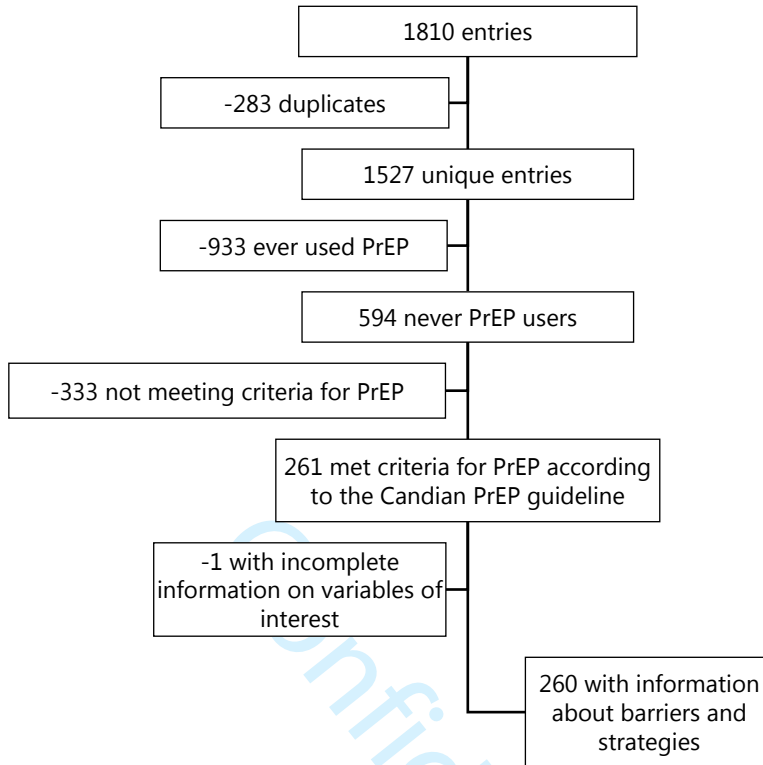

Confidential

**Table 1.** Sociodemographic characteristics of all the study participants and stratified by province.

|                                     | <b>All</b> |     | <b>Ontario</b> |     | <b>British Columbia</b> |     | <b>p-value</b> |
|-------------------------------------|------------|-----|----------------|-----|-------------------------|-----|----------------|
| <b>Age, median(IQR)</b>             | 31 (26-38) |     | 31 (26-37)     |     | 32 (27-40)              |     | 0.405          |
| 19-28                               | 94         | 36% | 68             | 37% | 26                      | 35% |                |
| 29-40                               | 116        | 45% | 85             | 46% | 31                      | 41% |                |
| 41-48                               | 25         | 10% | 15             | 8%  | 10                      | 13% |                |
| >=49                                | 24         | 9%  | 16             | 9%  | 8                       | 11% |                |
| Total                               | 259        |     | 184            |     | 75                      |     |                |
| <b>Ethnicity</b>                    |            |     |                |     |                         |     | 0.002*         |
| White                               | 147        | 57% | 105            | 57% | 42                      | 55% |                |
| Black                               | 15         | 6%  | 15             | 8%  | 0                       | 0%  |                |
| Indigenous people of Canada         | 8          | 3%  | 5              | 3%  | 3                       | 4%  |                |
| East Asian                          | 22         | 8%  | 9              | 5%  | 13                      | 17% |                |
| Southeast Asian                     | 18         | 7%  | 9              | 5%  | 9                       | 12% |                |
| South Asian                         | 7          | 3%  | 6              | 3%  | 1                       | 1%  |                |
| Middle Eastern                      | 11         | 4%  | 9              | 5%  | 2                       | 3%  |                |
| Latinx                              | 22         | 8%  | 18             | 10% | 4                       | 5%  |                |
| Others                              | 10         | 4%  | 8              | 4%  | 2                       | 3%  |                |
| Total                               | 260        |     | 184            |     | 76                      |     |                |
| <b>Place of birth</b>               |            |     |                |     |                         |     | 0.345          |
| Born in Canada                      | 172        | 66% | 125            | 68% | 47                      | 62% |                |
| Born outside of Canada              | 88         | 34% | 59             | 32% | 29                      | 38% |                |
| Total                               | 260        |     | 184            |     | 76                      |     |                |
| <b>Education</b>                    |            |     |                |     |                         |     |                |
| High school or less                 | 27         | 11% | 20             | 11% | 7                       | 9%  | 0.116          |
| College/technical                   | 73         | 28% | 46             | 25% | 27                      | 36% |                |
| Bachelor's degree                   | 102        | 40% | 80             | 44% | 22                      | 29% |                |
| Postgraduate degree                 | 55         | 21% | 36             | 20% | 19                      | 25% |                |
| Total                               | 257        |     | 182            |     | 75                      |     |                |
| <b>Annual Personal Income (CAD)</b> |            |     |                |     |                         |     |                |
| 20.000 or less                      | 31         | 12% | 24             | 13% | 7                       | 9%  | 0.789          |
| 20.001-40.000                       | 55         | 21% | 41             | 22% | 14                      | 18% |                |
| 40.001-60.000                       | 75         | 29% | 50             | 27% | 25                      | 33% |                |
| 60.001-80.000                       | 44         | 17% | 29             | 16% | 15                      | 20% |                |
| More than 80.000                    | 37         | 14% | 26             | 14% | 11                      | 15% |                |
| Prefers not to answer               | 17         | 7%  | 13             | 7%  | 4                       | 5%  |                |
| Total                               | 259        |     | 183            |     | 76                      |     |                |
| <b>Gender</b>                       |            |     |                |     |                         |     |                |

|                                 |     |     |     |     |    |     |        |
|---------------------------------|-----|-----|-----|-----|----|-----|--------|
| Man                             | 250 | 97% | 177 | 97% | 73 | 96% | 0.878* |
| Woman                           | 4   | 1%  | 3   | 2%  | 1  | 1%  |        |
| Two-Spirit                      | 1   | 1%  | 1   | 1%  | 0  | 0%  |        |
| Gender Fluid                    | 4   | 1%  | 2   | 1%  | 2  | 3%  |        |
| Total                           | 259 |     | 183 |     | 76 |     |        |
| <b>Relationship status</b>      |     |     |     |     |    |     |        |
| No regular partner              | 125 | 49% | 85  | 47% | 40 | 53% | 0.872* |
| Open relationship               | 93  | 36% | 68  | 38% | 25 | 33% |        |
| Closed relationship             | 29  | 11% | 21  | 12% | 8  | 11% |        |
| Prefers not to answer           | 10  | 4%  | 7   | 4%  | 3  | 4%  |        |
| Total                           | 257 |     | 181 |     | 76 |     |        |
| <b>Primary Care Provider</b>    |     |     |     |     |    |     |        |
| Yes                             | 163 | 63% | 124 | 67% | 39 | 51% | 0.040* |
| No                              | 90  | 35% | 56  | 30% | 34 | 45% |        |
| Prefers not to answer           | 7   | 3%  | 4   | 2%  | 3  | 4%  |        |
| Total                           | 260 |     | 184 |     | 76 |     |        |
| <b>How pays for medications</b> |     |     |     |     |    |     |        |
| Private                         | 153 | 59% | 110 | 60% | 43 | 57% | 0.162* |
| IFHP-refugees†                  | 1   | 1%  | 0   | 0%  | 1  | 1%  |        |
| NIHB-indigenous‡                | 5   | 2%  | 2   | 1%  | 3  | 4%  |        |
| BC Pharmacare                   | 1   | 1%  | 0   | 0%  | 1  | 1%  |        |
| Ontario Drug Benefit            | 20  | 8%  | 17  | 9%  | 3  | 4%  |        |
| Out of pocket                   | 71  | 27% | 48  | 26% | 23 | 30% |        |
| Other                           | 1   | 1%  | 1   | 1%  | 0  | 0%  |        |
| Prefers not to answer           | 7   | 3%  | 5   | 3%  | 2  | 3%  |        |
| Total                           | 259 |     | 183 |     | 76 |     |        |

\*Fisher's exact test. †IFHP: Interim Federal Health Program. ‡NIHB: Non-insured health benefits for First Nations people and Inuit.

**Table 2.** HIRI score, STIs, use of PEP and self-perceived risk of HIV for all included study participants and stratified by province. Figures sum to >100% due to many participants meeting multiple criteria.

|                              | <b>All</b> |     | <b>Ontario</b> |     | <b>British Columbia</b> | <b>p-value</b> |
|------------------------------|------------|-----|----------------|-----|-------------------------|----------------|
| <b>HIRI score, mean (SD)</b> | 20.5 (6.5) |     | 21.0 (6.4)     |     | 19.4 (6.6)              | 0.066          |
| Total                        | 260        |     | 184            |     | 76                      |                |
| <b>Syphilis</b>              |            |     |                |     |                         | 0.381          |
| Yes                          | 59         | 30% | 40             | 28% | 19                      | 35%            |
| No                           | 138        | 70% | 102            | 72% | 36                      | 65%            |
| Total                        | 197        |     | 142            |     | 55                      |                |
| <b>Rectal chlamydia</b>      |            |     |                |     |                         | 0.843          |
| Yes                          | 36         | 17% | 25             | 17% | 11                      | 18%            |
| No                           | 173        | 83% | 123            | 83% | 50                      | 82%            |
| Total                        | 209        |     | 148            |     | 61                      |                |
| <b>Rectal gonorrhea</b>      |            |     |                |     |                         | 0.426          |
| Yes                          | 40         | 19% | 31             | 20% | 9                       | 15%            |
| No                           | 174        | 81% | 124            | 80% | 50                      | 85%            |
| Total                        | 214        |     | 155            |     | 59                      |                |
| <b>PEP more than once</b>    |            |     |                |     |                         | 0.413          |
| Yes                          | 15         | 6%  | 12             | 7%  | 3                       | 4%             |
| No                           | 244        | 94% | 171            | 93% | 73                      | 96%            |
| Total                        | 259        |     | 183            |     | 76                      |                |

**Table 3.** Reasons for not using PrEP for all study participants and stratified by province.

|                                          | <b>All</b> |          | <b>Ontario</b> |          | <b>British Columbia</b> |          | <b>p-value</b> |
|------------------------------------------|------------|----------|----------------|----------|-------------------------|----------|----------------|
|                                          | <b>n</b>   | <b>%</b> | <b>n</b>       | <b>%</b> | <b>n</b>                | <b>%</b> |                |
| Concern about side effects               | 108        | 41%      | 77             | 42%      | 31                      | 41%      | 0.875          |
| Unable to afford it                      | 92         | 35%      | 80             | 43%      | 12                      | 16%      | <0.001         |
| Not feeling at high enough risk          | 76         | 29%      | 49             | 27%      | 27                      | 36%      | 0.151          |
| Unwillingness to take a pill regularly   | 65         | 25%      | 47             | 26%      | 18                      | 24%      | 0.753          |
| Lack of knowledge about where to get it  | 64         | 25%      | 48             | 26%      | 16                      | 21%      | 0.391          |
| Lack of protection against other STIs    | 50         | 19%      | 36             | 20%      | 14                      | 18%      | 0.831          |
| Consistent condom use for anal sex       | 33         | 13%      | 20             | 11%      | 13                      | 17%      | 0.17           |
| Concern about what others would think    | 32         | 12%      | 25             | 14%      | 7                       | 9%       | 0.329          |
| No particular reason                     | 22         | 8%       | 17             | 9%       | 5                       | 7%       | 0.483          |
| Other*                                   | 18         | 7%       | 9              | 5%       | 9                       | 12%      | 0.045          |
| Belief that PrEP is not effective enough | 11         | 4%       | 8              | 4%       | 3                       | 4%       | 0.884          |
| The HCP wouldn't prescribe it            | 10         | 4%       | 5              | 3%       | 5                       | 7%       | 0.141          |
| Lack of interest                         | 8          | 3%       | 5              | 3%       | 3                       | 4%       | 0.601          |
| <b>Total participants</b>                | <b>260</b> |          | <b>184</b>     |          | <b>76</b>               |          |                |

\*Other reasons included: the process to getting PrEP is too complicated, busy schedule, no or infrequent anal sex, being monogamous, privacy issues, being told that they are not at high enough risk, among others.

**Table 4.** Strategies that would more likely influence the decision to start PrEP for all participants and stratified by province.

| Strategies that might influence the decision to start PrEP | All participants |     | Ontario |     | British Columbia |     | p-value |
|------------------------------------------------------------|------------------|-----|---------|-----|------------------|-----|---------|
|                                                            | n                | %   | n       | %   | n                | %   |         |
| Short waiting time to PrEP appointment                     | 160              | 65% | 114     | 63% | 46               | 68% | 0.526   |
| HCP informing about being at higher risk than perceived    | 155              | 63% | 111     | 62% | 44               | 64% | 0.837   |
| Written step-by-step guide                                 | 152              | 61% | 109     | 60% | 43               | 61% | 0.861   |
| People speaking publicly about PrEP                        | 147              | 59% | 101     | 56% | 46               | 68% | 0.099   |
| HCP informing about how well PrEP works                    | 144              | 58% | 101     | 57% | 43               | 62% | 0.425   |
| Help finding publicly funded PrEP                          | 142              | 57% | 103     | 58% | 39               | 57% | 0.884   |
| A list of PrEP providers                                   | 140              | 57% | 99      | 56% | 41               | 59% | 0.588   |
| HCP counselling about side effects                         | 136              | 55% | 92      | 51% | 44               | 65% | 0.055   |
| People disclosing their PrEP use on apps                   | 138              | 55% | 97      | 54% | 41               | 60% | 0.343   |
| A navigator to find providers                              | 128              | 51% | 91      | 51% | 37               | 53% | 0.774   |
| An online program to calculate risk                        | 124              | 50% | 90      | 51% | 34               | 49% | 0.856   |
| A publicity campaign promoting PrEP                        | 118              | 48% | 84      | 47% | 34               | 51% | 0.568   |
| Information to bring to their HCP                          | 94               | 38% | 60      | 34% | 34               | 50% | 0.020   |



**Table S1 and S2.** Reasons for not using PrEP stratified by level of formal education and by ethnicity.

| Reasons for not using PrEP               | Less than Bachelor's |     | More than Bachelor's |     | p-value |
|------------------------------------------|----------------------|-----|----------------------|-----|---------|
|                                          | n                    | %   | n                    | %   |         |
| Concern about side effects               | 43                   | 43% | 65                   | 41% | 0.755   |
| Unable to afford it                      | 43                   | 43% | 49                   | 31% | 0.049   |
| Unwillingness to take a pill regularly   | 25                   | 25% | 40                   | 25% | 0.964   |
| Lack of knowledge about where to get it  | 25                   | 25% | 39                   | 24% | 0.945   |
| Not feeling at high enough risk          | 21                   | 21% | 55                   | 34% | 0.019   |
| Consistent condom use for anal sex       | 16                   | 16% | 17                   | 11% | 0.217   |
| Lack of protection against other STIs    | 14                   | 14% | 36                   | 23% | 0.084   |
| No particular reason                     | 12                   | 12% | 10                   | 6%  | 0.111   |
| Concern about what others would think    | 8                    | 8%  | 24                   | 15% | 0.089   |
| The HCP wouldn't prescribe it            | 5                    | 5%  | 5                    | 3%  | 0.454   |
| Belief that PrEP is not effective enough | 4                    | 4%  | 7                    | 4%  | 0.871   |
| Other                                    | 3                    | 3%  | 15                   | 9%  | 0.047   |
| Lack of interest                         | 2                    | 2%  | 6                    | 4%  | 0.419   |

  

| Reasons for not using PrEP               | White    | Black   | Indigenous | East Asian | South East Asian | South Asian | Middle Eastern | Latinx   | Other   | p-value |
|------------------------------------------|----------|---------|------------|------------|------------------|-------------|----------------|----------|---------|---------|
|                                          |          |         |            |            |                  |             |                |          |         |         |
| Unable to afford it                      | 52 (35%) | 5 (33%) | 1 (13%)    | 4 (18%)    | 3 (17%)          | 4 (57%)     | 6 (55%)        | 12 (55%) | 5 (50%) | 0.052   |
| Unwillingness to take a pill regularly   | 43 (29%) | 5 (33%) | 1 (13%)    | 6 (27%)    | 0 (0%)           | 2 (29%)     | 1 (9%)         | 5 (23%)  | 2 (20%) | 0.148   |
| Lack of knowledge about where to get it  | 37 (25%) | 4 (27%) | 1 (13%)    | 6 (27%)    | 5 (28%)          | 2 (29%)     | 2 (18%)        | 4 (18%)  | 3 (30%) | 0.989   |
| Not feeling at high enough risk          | 50 (34%) | 2 (13%) | 2 (25%)    | 8 (36%)    | 4 (22%)          | 1 (14%)     | 4 (36%)        | 4 (18%)  | 1 (10%) | 0.435   |
| Consistent condom use for anal sex       | 21 (14%) | 4 (27%) | 1 (13%)    | 2 (9%)     | 3 (17%)          | 1 (14%)     | 0 (0%)         | 1 (5%)   | 0 (0%)  | 0.486   |
| Lack of protection against other STIs    | 31 (21%) | 2 (13%) | 3 (38%)    | 5 (23%)    | 2 (11%)          | 1 (14%)     | 1 (9%)         | 3 (14%)  | 2 (20%) | 0.856   |
| No particular reason                     | 18 (12%) | 0 (0%)  | 1 (13%)    | 0 (0%)     | 0 (0%)           | 0 (0%)      | 0 (0%)         | 2 (9%)   | 1 (10%) | 0.360   |
| Concern about what others would think    | 19 (13%) | 3 (20%) | 3 (38%)    | 1 (5%)     | 1 (6%)           | 2 (29%)     | 0 (0%)         | 1 (5%)   | 2 (20%) | 0.113   |
| The HCP wouldn't prescribe it            | 6 (4%)   | 0 (0%)  | 0 (0%)     | 1 (5%)     | 0 (0%)           | 1 (14%)     | 0 (0%)         | 2 (9%)   | 0 (0%)  | 0.622   |
| Belief that PrEP is not effective enough | 6 (4%)   | 1 (7%)  | 0 (0%)     | 2 (9%)     | 1 (6%)           | 1 (14%)     | 0 (0%)         | 0 (0%)   | 0 (0%)  | 0.542   |
| Other                                    | 11 (7%)  | 1 (7%)  | 0 (0%)     | 2 (9%)     | 3 (17%)          | 0 (0%)      | 1 (9%)         | 0 (0%)   | 0 (%)   | 0.658   |

|   |                  |        |        |        |        |        |         |        |        |        |       |
|---|------------------|--------|--------|--------|--------|--------|---------|--------|--------|--------|-------|
| 1 | Lack of interest | 5 (3%) | 0 (0%) | 0 (0%) | 1 (5%) | 0 (0%) | 1 (14%) | 1 (9%) | 0 (0%) | 0 (0%) | 0.483 |
|---|------------------|--------|--------|--------|--------|--------|---------|--------|--------|--------|-------|

**Table S3 and S4.** Strategies that might influence the decision to start PrEP stratified by level of formal education and by ethnicity.

| 8  | Strategies that might influence the decision to start PrEP | Less than Bachelor's | Bachelor's degree or higher | p-value |     |       |
|----|------------------------------------------------------------|----------------------|-----------------------------|---------|-----|-------|
| 10 | Short waiting time to PrEP appointment                     | 53                   | 56%                         | 107     | 70% | 0.024 |
| 11 | Written step-by-step guide                                 | 52                   | 54%                         | 100     | 65% | 0.074 |
| 12 | A navigator to find providers                              | 52                   | 54%                         | 76      | 50% | 0.579 |
| 14 | HCP informing about being at higher risk than perceived    | 49                   | 52%                         | 106     | 69% | 0.007 |
| 16 | HCP informing about how well PrEP works                    | 49                   | 52%                         | 95      | 62% | 0.123 |
| 18 | People speaking publicly about PrEP                        | 49                   | 52%                         | 98      | 64% | 0.074 |
| 19 | People disclosing their PrEP use on apps                   | 49                   | 52%                         | 89      | 58% | 0.338 |
| 21 | Help finding publicly funded PrEP                          | 44                   | 47%                         | 98      | 64% | 0.009 |
| 22 | HCP counselling about side effects                         | 44                   | 47%                         | 92      | 60% | 0.047 |
| 24 | A list of PrEP providers                                   | 45                   | 46%                         | 95      | 63% | 0.009 |
| 25 | An online program to calculate risk                        | 41                   | 44%                         | 83      | 54% | 0.105 |
| 27 | A publicity campaign promoting PrEP                        | 41                   | 43%                         | 77      | 51% | 0.251 |
| 28 | Information to bring to their HCP                          | 31                   | 33%                         | 63      | 42% | 0.142 |

| 33 | Strategies that might influence the decision to start PrEP | White    | Black    | Indigenous | East Asian | South East Asian | South Asian | Middle Eastern | Latinx   | Other   | p-value |
|----|------------------------------------------------------------|----------|----------|------------|------------|------------------|-------------|----------------|----------|---------|---------|
| 35 | Short waiting time to PrEP appointment                     | 89 (64%) | 9 (64%)  | 4 (67%)    | 14 (67%)   | 13 (72%)         | 6 (86%)     | 5 (45%)        | 15 (71%) | 5 (50%) | 0.781   |
| 36 | Written step-by-step guide                                 | 83 (59%) | 9 (64%)  | 4 (57%)    | 12 (55%)   | 14 (78%)         | 3 (43%)     | 7 (64%)        | 15 (68%) | 5 (50%) | 0.780   |
| 37 | A navigator to find providers                              | 67 (48%) | 7 (50%)  | 3 (43%)    | 15 (68%)   | 12 (67%)         | 4 (57%)     | 3 (27%)        | 12 (57%) | 5 (50%) | 0.445   |
| 38 | HCP informing about being at higher risk than perceived    | 83 (61%) | 11 (73%) | 2 (29%)    | 16 (73%)   | 13 (72%)         | 5 (71%)     | 7 (64%)        | 13 (65%) | 5 (50%) | 0.570   |
| 40 | HCP informing about how well PrEP works                    | 75 (55%) | 9 (60%)  | 2 (29%)    | 17 (77%)   | 13 (72%)         | 4 (57%)     | 4 (36%)        | 14 (67%) | 6 (60%) | 0.227   |

|   |                                          |          |         |         |          |          |         |         |          |         |       |
|---|------------------------------------------|----------|---------|---------|----------|----------|---------|---------|----------|---------|-------|
| 1 | People speaking publicly about PrEP      | 81 (59%) | 6 (40%) | 4 (57%) | 14 (64%) | 13 (76%) | 3 (43%) | 6 (60%) | 14 (64%) | 6 (60%) | 0.698 |
| 2 | People disclosing their PrEP use on apps | 74 (54%) | 7 (47%) | 5 (71%) | 13 (59%) | 14 (78%) | 4 (57%) | 5 (45%) | 13 (59%) | 3 (30%) | 0.413 |
| 3 | Help finding publicly funded PrEP        | 75 (54%) | 6 (46%) | 3 (43%) | 17 (77%) | 12 (71%) | 6 (86%) | 5 (45%) | 14 (64%) | 4 (40%) | 0.188 |
| 4 | HCP counselling about side effects       | 68 (49%) | 8 (53%) | 1 (17%) | 15 (71%) | 14 (82%) | 6 (86%) | 6 (55%) | 12 (55%) | 6 (60%) | 0.042 |
| 5 | A list of PrEP providers                 | 77 (55%) | 9 (64%) | 2 (29%) | 15 (68%) | 10 (59%) | 5 (71%) | 6 (60%) | 11 (52%) | 5 (56%) | 0.805 |
| 6 | An online program to calculate risk      | 60 (44%) | 8 (53%) | 3 (43%) | 9 (41%)  | 13 (72%) | 6 (86%) | 7 (64%) | 14 (67%) | 4 (40%) | 0.095 |
| 7 | A publicity campaign promoting PrEP      | 59 (43%) | 8 (53%) | 5 (71%) | 11 (50%) | 12 (71%) | 4 (57%) | 4 (36%) | 11 (52%) | 4 (40%) | 0.457 |
| 8 | Information to bring to their HCP        | 39 (29%) | 9 (60%) | 3 (43%) | 10 (48%) | 11 (61%) | 4 (67%) | 3 (27%) | 14 (64%) | 1 (11%) | 0.001 |

10

11

12

13

#### 14 Appendix 1. Survey questions.

15

16 Were any of the following part of the reason that you have never used PrEP? (check all that apply)

17

- 18 •  I'm worried about side effects
- 19 •  I didn't know where to get it
- 20 •  I couldn't afford the medication cost
- 21 •  I was diagnosed with HIV
- 22 •  The healthcare provider I went to would not prescribe it to me
- 23 •  I didn't feel I was at high enough risk for HIV
- 24 •  I was worried about what others would think about me taking PrEP
- 25 •  I don't think it is effective enough at preventing HIV
- 26 •  It does not prevent other STIs
- 27 •  I don't want to take a pill regularly
- 28 •  I always use condoms for anal sex
- 29 •  I can't be bothered
- 30 •  No, there is no particular reason that I have never used PrEP
- 31 •  Other reason (describe): \_\_\_\_\_

32

33

34

35

36

37 How would each of these things change how likely you are to go onto PrEP?

38

39

40

41

42

43

44

45

46

47

1  
2  
3  
4  
5  
6  
7  
8  
9  
10  
11  
12  
13  
14  
15  
16  
17  
18  
19  
20  
21  
22  
23  
24  
25  
26  
27  
28  
29  
30  
31  
32  
33  
34  
35  
36  
37  
38  
39  
40  
41  
42  
43  
44  
45  
46  
47

|                                                                                        | <b>This would make me LESS likely to go on PrEP</b> | <b>This would not change how likely I am to go on PrEP</b> | <b>This would make me MORE likely to go on PrEP</b> |
|----------------------------------------------------------------------------------------|-----------------------------------------------------|------------------------------------------------------------|-----------------------------------------------------|
| a. Information I could bring to my doctor to help them learn about PrEP.               | <input type="radio"/>                               | <input type="radio"/>                                      | <input type="radio"/>                               |
| b. A list of other providers in my area that prescribe PrEP.                           | <input type="radio"/>                               | <input type="radio"/>                                      | <input type="radio"/>                               |
| c. A short waiting time for my first PrEP appointment.                                 | <input type="radio"/>                               | <input type="radio"/>                                      | <input type="radio"/>                               |
| d. A written step-by-step guide to going onto PrEP.                                    | <input type="radio"/>                               | <input type="radio"/>                                      | <input type="radio"/>                               |
| e. Someone working with me to find a provider that prescribes PrEP.                    | <input type="radio"/>                               | <input type="radio"/>                                      | <input type="radio"/>                               |
| f. Someone working with me to access the publicly funded PrEP program in my province.  | <input type="radio"/>                               | <input type="radio"/>                                      | <input type="radio"/>                               |
| g. An online program that allows me to calculate my risk of HIV.                       | <input type="radio"/>                               | <input type="radio"/>                                      | <input type="radio"/>                               |
| h. A healthcare provider telling me that my risk for HIV is higher than I thought.     | <input type="radio"/>                               | <input type="radio"/>                                      | <input type="radio"/>                               |
| i. A healthcare provider counselling me in detail about how well PrEP works.           | <input type="radio"/>                               | <input type="radio"/>                                      | <input type="radio"/>                               |
| j. A healthcare provider counselling me in detail about the risk of PrEP side effects. | <input type="radio"/>                               | <input type="radio"/>                                      | <input type="radio"/>                               |
| k. A publicity campaign in my community promoting PrEP as a responsible choice.        | <input type="radio"/>                               | <input type="radio"/>                                      | <input type="radio"/>                               |
| l. More people in my community speaking publicly about their experiences taking PrEP.  | <input type="radio"/>                               | <input type="radio"/>                                      | <input type="radio"/>                               |
| m. More people on social media and hookup apps disclosing that they are on PrEP.       | <input type="radio"/>                               | <input type="radio"/>                                      | <input type="radio"/>                               |

Confidential

1  
2  
3 **Reasons for not using HIV PrEP and strategies that may facilitate HIV PrEP uptake in Ontario and**  
4 **British Columbia among gay, bisexual and other men who have sex with men**  
5  
6  
7

8 **AUTHORS**  
9

10 Oscar Javier Pico-Espinosa, MD MSPH PhD, **St Michael's Hospital, Toronto, ON, Canada**

11 Mark Hull, MD MHSc FRCPC, **BC Centre for Excellence in HIV/AIDS, Vancouver, BC, Canada,**  
12 **University of British Columbia, Vancouver, BC, Canada.**

13 Paul MacPherson MD FRCPC PhD, **University of Ottawa, Ottawa, ON, Canada**

14 Daniel Grace PhD, **University of Toronto, Toronto, ON, Canada**

15 Nathan Lachowsky, PhD, **University of Victoria, Victoria, BC, Canada**

16 Mark Gaspar PhD, **University of Toronto, Toronto, ON, Canada**

17 Saira Mohammed BHE MSc CCRP, **BC Centre for Excellence in HIV/AIDS, Vancouver, BC, Canada**

18 Robinson Truong BSc, **St Michael's Hospital, Toronto, ON, Canada**

19 Darrell H. S. Tan MD FRCPC PhD, **St Michael's Hospital, Toronto, ON, Canada**  
20  
21  
22

23 **Corresponding author**  
24

25 Oscar Javier Pico-Espinosa

26 Oscarjavier.picoespinosa@unityhealth.to

27 Li Ka Shing Knowledge Institute, St. Michael's Hospital.

28 209 Victoria Street, Toronto

29 M5B 18T, ON  
30  
31  
32  
33  
34  
35  
36  
37  
38  
39  
40  
41  
42  
43  
44  
45  
46  
47  
48  
49  
50  
51  
52  
53  
54  
55  
56  
57  
58  
59  
60

## ABSTRACT

### Background

HIV Pre-exposure prophylaxis (PrEP) is underutilized. We aimed to identify barriers to PrEP use and strategies that may facilitate its uptake.

### Methods

Gay, bisexual and other men who have sex with men 19 years or older living in Ontario and British Columbia, Canada, completed a cross-sectional survey in 2019/2020. Participants who met Canadian PrEP guideline criteria and not already using PrEP identified relevant barriers and which strategies would make them more likely to start PrEP. We described such barriers and strategies separately for Ontario and British Columbia.

### Results

Of 1527 survey responses, 261 who never used PrEP and met criteria for PrEP were included. In Ontario, the most common barriers were affordability (43%) and concern about side effects (42%). In British Columbia, the most common reasons were concern about side effects (41%) and not feeling at high enough risk (36%). In Ontario, preferred strategies were: short waiting time (63%), the healthcare provider informing about their HIV risk being higher than perceived (62%) and a written step-by-step guide (60%). In British Columbia, strategies were: short waiting time (68%), people speaking publicly about PrEP (68%) and their healthcare provider counselling about: their HIV risk being higher than perceived (64%), side effects of PrEP (65%) and about how well PrEP works (62%).

### Conclusions

Concern about side effects and not self-identifying as high risk for HIV were common barriers. Shorter waiting times may increase PrEP uptake. In Ontario, the findings suggested lack of affordability. In British Columbia, strategies involving healthcare providers were valued.

**Key words:** HIV Pre-exposure prophylaxis, prevention, men who have sex with men, gender and sexual minorities, accessibility of health services.

## INTRODUCTION

HIV pre-exposure prophylaxis (PrEP) using tenofovir disoproxil fumarate/emtricitabine (TDF/FTC) is highly effective at reducing the risk of HIV infection[1-3] and has been approved for daily use in Canada since 2016. However, despite a significant increase in the number of PrEP users in the past years[4, 5], that is still far below the estimated number of people who could benefit from PrEP.[6, 7] Barriers to PrEP uptake exist at the individual, interpersonal, community and structural level.[8] At the individual level, lack of awareness, perceived lack of efficacy, concern about side effects and low HIV risk perception are common. At the interpersonal level, there is fear of risk compensation (increase in risk-taking behaviors as a result of a decrease in perceived risk) and stigma from peers, family and friends. At the community level, barriers include mistrust of the pharmaceutical industry and medical establishment, and inadequate access to health care providers experienced in working with sexual or gender minorities. In addition, providers' lack of awareness or training, lack of referral pathways, concern about risk compensation, and concern about patient adherence can be barriers.[9, 10] Finally, at the structural level, issues of affordability as it is the case in Ontario where PrEP is not fully funded, institutionalized racism/discrimination and structural stigma play a major role in the disparate access to and limited uptake of PrEP. [8, 11-18]

All such barriers are potentially modifiable, with some requiring more individual-focused actions such as education/health promotion with individuals whom could benefit from PrEP, and others operating at the policy level such as full public funding for PrEP. To decide what methods and strategies could help individuals at risk of HIV access PrEP, it is necessary to describe the key determinants and/or the barriers to access and use. Relevant methods could be empowerment, improving perceived relevance, influencing the reference group or redesign of services[19-21]; and the strategies that can translate such methods into actions include counselling, peer education, information provision, having role models, and the availability of guides, among others.[19-21] An important component of such intervention planning is to consider end users' (in this case, potential PrEP users) preferences regarding what strategies might have an impact on their decision to initiate PrEP. The aims of this analysis were to identify the barriers to PrEP use among GBM who have never used PrEP who met Canadian guideline criteria[6], to identify strategies most likely to influence GBM nonusers' decision to start PrEP and to explore differences between Ontario and British Columbia.

## METHODS

The PrEP implementation project (PRIMP) is a multicomponent PrEP Implementation study investigating strategies for increasing PrEP uptake among urban GBM in Ontario and British Columbia, Canada. One component is an open voluntary cross-sectional survey, which recruited participants from: Toronto, Ottawa and Hamilton in Ontario; and Vancouver and Victoria in British Columbia. These cities were selected because they are the largest urban centers in the two largest English speaking provinces in Canada, as well as because of their differential medication coverage policies: PrEP is universally covered in British Columbia but not in Ontario. Potential participants were recruited via various means, including English-language posters and information cards distributed in sexual health clinics, advertisements on popular GBM dating apps, and via social media (Facebook and dating apps) promotion by collaborating community organizations. Responses were automatically stored into a database and questions were adapted based on responses to other items.

Inclusion criteria were being age 19 years or older, identifying as cisgender man, transgender man or transgender woman, being able to communicate in English, reported MSM sexual behavior in the past six months and provided consent. Volunteers or employees of any community health services organization were excluded. Recruitment took place between July 2019 and August 2020. ~~Participants were offered a \$10 CAD gift card as compensation for their time.~~

The survey included questions about sociodemographic variables and sexual health. The survey was previously tested for usability and technical functionality, ~~with the possibility and allowed~~ to navigate back and forth. ~~Self-reported sexual health variables included as per the~~ Canadian guideline criteria for PrEP[6] ~~were asked to determine PrEP eligibility for the present analysis, which for GBM, Such criteria~~ ~~are consist of~~ condomless anal sex ~~in the past six months~~ plus any of the following: infectious syphilis, rectal gonorrhea, rectal chlamydia, repeated use of non-occupational post-exposure prophylaxis [nPEP], ~~and or~~ scoring  $\geq 11$  on the High Incidence Risk Index for Men Who Have Sex with Men (HIRI-MSM)[22]. We did not collect information about the viral load status of respondents' partners who were living with HIV. We also asked never PrEP users about their reasons for not using PrEP and what strategies would influence their decision to start PrEP ~~from a list of possible barriers and strategies respectively, based on previous experience working with GBM trying to access PrEP (see appendix 1).~~

Data are presented for the entire study sub-sample and stratified by province. For continuous variables, mean and standard deviation or median and interquartile range are presented depending on their distribution. Categorical data are presented as proportions. We analyzed all available data. Differences between provinces were tested using the Chi-square or Fisher's exact test for categorical variables, or with t-tests or Wilcoxon rank-sum tests for continuous variables. We did post-hoc analyses to explore the reasons for not using PrEP and the strategies to increase PrEP uptake ~~for specific subgroups: those with less stratified by level of formal education than a Bachelor's degree, and those not identifying as white born in Canada and ethnicity. Examining these subgroups is relevant considering differential HIV rates and PrEP uptake in Canada and in other settings, as data shows that Black, Latinx and indigenous are at a more disadvantaged position.~~[23-26].

Sample size for the overall PRIMP survey was calculated based on previous surveys on PrEP awareness, acceptability and usage[27, 28]. This resulted in a sample size of 250 participants in each city (1250 in total) to estimate these proportions with adequate precision. However, the present analyses include only never PrEP users who meet criteria for PrEP according to the Canadian PrEP guideline.[6] This study was reviewed and approved by the Research Ethics Boards of Clinical Trials Ontario, Unity Health Toronto, University Health Network, Toronto Public Health, University of Toronto, York Region, University of British Columbia and University of Victoria. (REB 18-346). Study data are securely stored at password protected server at St. Michael's Hospital in Toronto. ~~Participants were offered a \$10 CAD gift card as compensation for their time.~~

## RESULTS

In total, ~~1810 survey responses were recorded. However, 283 were excluded for not meeting the inclusion criteria or for including inconsistent data (e.g. double entries or repeated e-mail addresses). Of the remaining 1527 who initiated the questionnaire, 1181 answered the questions about barriers to PrEP use and strategies to increase uptake, and 790 met Canadian guideline criteria for PrEP; of these~~



1  
2  
3 ~~790, 260 participants (33%) had never used PrEP and~~ were included in this analysis; ~~(184 from Ontario~~  
4 and 76 from British Columbia (Figure 1)). The median age was 31 years (IQR: 26-38) and 61% had at least  
5 a Bachelor's degree. In both provinces, ~~the largest sociocultural background reported was most were~~  
6 ~~Canada-born~~ White (547%). Private drug insurance (59%) and out of pocket (27%) were the most  
7 common forms of paying for medications (Table 1).  
8  
9

10 -TABLE 1-

11 Descriptive and comparative analyses of PrEP eligibility are shown in Table 2. Participants were PrEP  
12 eligible based on a prior bacterial STI diagnosis (syphilis, rectal gonorrhea and/or rectal chlamydia) in 99  
13 (38% of the sample), prior recurrent PEP use in 15 (6%), and HIRI score  $\geq 11$  in 256 (98%).  
14  
15

16  
17  
18 -TABLE 2-

19 In Ontario, the most common reasons for not using PrEP was cost (43%), unlike BC where cost was  
20 reported as a barrier by 16% ( $p < 0.001$ ) (Table 3). Other common reasons were: concern about side  
21 effects (42% in Ontario and 41% in BC) and not feeling at high enough risk (27% in Ontario and 36% in  
22 BC). Unwillingness to take a pill regularly was also common in BC (24%) (Table 3).  
23  
24

25 -TABLE 3-

26 Strategies that might influence participants' decision to start PrEP are shown in table 4. In Ontario, these  
27 were short waiting time (63%), healthcare providers informing them about their HIV risk being higher  
28 than perceived (62%) and a written step-by-step guide on how to access PrEP (60%). In British Columbia,  
29 these were short waiting time (68%), people speaking publicly about PrEP (68%) and their healthcare  
30 provider counselling them about: their HIV risk being higher than perceived (64%), side effects of PrEP  
31 (65%) and about how well PrEP works (62%).  
32  
33  
34

35 -TABLE 4-

36 In the post-hoc analyses, being unable to afford PrEP was more common among participants with less  
37 than a Bachelor's degree (43%) compared with those with at least a Bachelor's degree (31%,  $p=0.049$ ).  
38 In contrast, not feeling at high enough risk was less common (21% vs 34%,  $p: 0.019$ ). (Table S1).  
39 Likewise, Latinx, South Asian and Middle Eastern indicated affordability as one of the main barriers for  
40 PrEP uptake slightly more often than other groups ( $p: 0.052$ ). Furthermore, participants with less than a  
41 Bachelor's degree were less likely to identify any of the listed reasons (see table 4) as strategies that  
42 would influence their decision to start PrEP (Table S2). ~~Participants who identified with a non-white~~  
43 ~~identity or who were white and born outside of Canada were more likely to choose "having their HCP~~  
44 ~~counseling them about side effects of PrEP" (62% vs 46%,  $p: 0.01$ ) and "help finding publicly funded~~  
45 ~~PrEP" (62% vs 51%,  $p: 0.078$ ) than participants who were Canada-born White (Table S2).  
46  
47  
48  
49~~

## 50 DISCUSSION

51 In this community-based sample of GBM in five large cities in Ontario and British Columbia, we found  
52 that a third of those meeting evidence-based criteria for PrEP initiation had never used it. Concern about  
53 side effects, affordability and not feeling at high enough risk were the most common barriers to PrEP  
54 uptake. Short waiting time was the most preferred strategy to increase PrEP uptake; other strategies  
55  
56  
57  
58  
59  
60

1  
2  
3 included healthcare providers informing clients about their HIV risk being higher than perceived,  
4 counselling side effects of PrEP and about how well PrEP works; written guides; and people speaking  
5 publicly about PrEP. The largest observed difference between the provinces was affordability as a  
6 reason for not using PrEP.  
7

8  
9 In Ontario, 43% of participants identified cost as a reason for not accessing PrEP (in contrast to 16% in  
10 BC). While PrEP is listed on Ontario's public drug formulary, there are both administrative and financial  
11 barriers to accessing this formulary[29], such that only 23% of PrEP users in the province access it  
12 through this mechanism[4]. ~~Paradoxically, therefore, many GBM who could benefit the most from PrEP,~~  
13 ~~are often the least able to afford it and/or are not eligible for publicly funded drugs.~~ In contrast, in  
14 British Columbia, PrEP is publicly funded if clinical criteria based on the Canadian guideline for PrEP are  
15 met,[30] making it one of only a few provinces/territories in Canada where PrEP is fully funded.[30-33]  
16 Nevertheless, affordability was ~~still~~ cited as a barrier to PrEP uptake in 16% of British Columbia  
17 respondents, ~~possibly due to reasons related to immigration status, costs associated with accessing the~~  
18 ~~medication (e.g. travel) or inter-provincial portability policies.~~ Universal PrEP access across Canada is  
19 urgently required to address this fundamental barrier to health equity.  
20  
21

22  
23 Concern about side effects was the most common reason for not using PrEP in the overall sample. This  
24 finding suggests that more public education is required regarding PrEP's generally favourable side effect  
25 profile,[1-3] perhaps emphasizing that the most common regimen of PrEP, TDF/FTC, does not carry a  
26 risk of serious adverse events higher than placebo. [1-3] ~~in this regard, ¶~~the main tolerability issue  
27 associated with PrEP is gastrointestinal upset which tends to be mild and resolves spontaneously within  
28 the first month.[34] ~~In addition, A~~although more long-term data are needed, it is known the  
29 asymptomatic renal and bone toxicities of FTC-TDF include slight elevations in creatinine and modest  
30 decreases in bone mineral density that are generally reversible with drug discontinuation, and can  
31 generally be monitored and managed clinically.[1, 34-37] The side effect profile is similar for on demand  
32 FTC-TDF (two pills prior to sexual activity and one pill per day for two days after).[3] Furthermore, a  
33 more recent form of PrEP, Emtricitabine and tenofovir alafenamide (TAF-FTC) has shown a slightly better  
34 safety profile than FTC-TDF in terms of creatinine levels and bone density.[2] While concerns about side  
35 effects might be mitigated by providing more information about PrEP, the collective memory of side  
36 effects related to HIV treatment and medical mistrust might be important contributing factors to such  
37 concerns.[15, 16] Creative interventions that go beyond traditional patient education may thus be  
38 needed to overcome these barriers.  
39  
40  
41

42  
43 Not feeling at high enough risk was common among the study participants. While some of the non-users  
44 are in fact at low risk of HIV infection, including those in monogamous relationships or in those with  
45 consistent condom use,[6, 38] many GBM may underestimate their risk.[6] This misalignment between  
46 the potential user's and the clinician's perspectives has been previously described in the literature as  
47 one of the main barriers to PrEP uptake,[39] but requires deeper study.  
48

49 ~~Our findings indicated the need for more innovative social marketing strategies. Written guides about~~  
50 ~~accessing PrEP, one of the preferred strategies in Ontario, could include information about how HIV risk~~  
51 ~~is assessed and when an individual should consider PrEP. In British Columbia, where having people~~  
52 ~~speaking publicly about PrEP was a popular choice, messaging about PrEP on social media and other~~  
53 ~~channels using digital platforms could perhaps include information about risk self-assessment too.~~  
54  
55  
56  
57  
58  
59  
60

Participants in both provinces reported that short waiting times might increase their chances of starting PrEP. ~~Unpublished data from our survey data shows that typically, a person waits between two to three weeks the median waiting time~~ from the moment ~~a person they~~ decide to go on PrEP ~~until they and~~ get a prescription ~~ranges between seven days and two months~~. [40] Further, potential users might feel discouraged if they cannot access PrEP directly from their primary care provider, especially if there is already some hesitancy to start PrEP. While not without limitations, interventions such as telemedicine or decentralization of access to PrEP through engagement of other healthcare professionals, pharmacists, HIV testing sites or community organizations could reduce waiting times. [41]

In British Columbia, a large proportion of participants reported that having their healthcare provider informing them about how well PrEP works, counselling them about side effects and informing them about their HIV risk being higher than perceived would positively influence their decision to start PrEP. The latter was also commonly reported in Ontario. This indicates that strategies aiming to improve PrEP uptake must engage health care providers. Importantly, informing high-risk MSM of their calculated risk as a stand-alone intervention rather than in the context of a visit to a provider, is not sufficient to increase PrEP uptake [42], suggesting that successful strategies should be multicomponent. Providers should follow a personalized approach: acknowledge patient's sexual behaviors, assess and address potential users' concerns, come up with a joint risk-reduction plan, and provide follow-up. Short interventions containing some of these elements have been associated with an increase in providers' abilities to discuss HIV prevention at HIV clinics. [43] If

~~Our findings indicated the need for more innovative social marketing strategies. wWritten guides about accessing PrEP are used, one of the preferred strategies in Ontario, could include information about how HIV risk is assessed and when an individual should consider PrEP could be included. In British Columbia, where having~~ Our findings indicated the need for more innovative social marketing strategies. pPeople speaking publicly about PrEP, was a popular choice and, messaging about PrEP on social media and other channels using digital platforms could perhaps include information about risk self-assessment too.

In the post-hoc analyses, ~~we observed signs of disparities depending on level of formal education and ethnicity. Latinx, south Asian and Middle Eastern reported cost as a barrier more often than other ethnic groups and more often than other barriers. we observed that our findings vary depending on sociocultural background, and particularly, education level. Of note~~ Furthermore, those with education levels lower than a Bachelor's degree reported lower acceptability of almost all listed strategies ~~that might~~ influence their decision to start PrEP, raising the question of what works best for whom.

Our study has limitations. One potential limitation of this study is that ~~Our findings may not be generalizable to smaller urban centers or other rural areas in Canada, where other types of barriers may exist be more relevant. However, it's worth highlighting that considering that affordability was one of the main barriers, introducing universally funded PrEP for eligible individuals may result in increased PrEP uptake in both urban and rural areas, considering that affordability was selected as one of the main barriers. Similarly, short waiting times and healthcare providers able to inform about different aspects of PrEP might also have a positive effect in other areas various settings. Another potential limitation is that~~ In addition, participants were recruited from sexual health clinics and through advertisements on specific internet platforms, ~~which means meaning~~ that our results might not be representative of people not engaged in care and/or less active on social media, who possibly experience more difficulties accessing PrEP or information about PrEP. We do not believe that providing compensation for

participating in the survey had a large influence on the final sample as we do not believe the honorarium provided had an important impact on accepting risks derived from taking the survey that they would not have accepted otherwise. Finally, our study was not sufficiently powered to identify differences between subgroups; however, we observed indications of differences in the role of affordability based on ethnicity and acceptability of strategies to increase PrEP uptake based on level of formal education.

## CONCLUSIONS

Concern about side effects and not feeling at high enough risk were common barriers in both provinces. In Ontario, the findings suggested structural issues such as affordability and accessibility. In British Columbia, strategies involving healthcare providers were often valued. Future interventions must consider barriers on various levels, including potential users' knowledge and attitudes towards PrEP, the capacity of healthcare providers to provide information and prescribe PrEP and what policies for medication coverage are in place.

## ACKNOWLEDGEMENTS

This project received funding from the Canadian Institutes of Health Research (CIHR). DHST is supported by a Tier 2 Canada Research Chair in HIV Prevention and STI Research. DG is supported by a Canada Research Chair in Sexual and Gender Minority Health.

We acknowledge that the land where this research took place is the traditional territory of many nations and is now home to many diverse First Nations, Inuit and Métis peoples.

## REFERENCES

1. Grant, R., et al., *Preexposure chemoprophylaxis for HIV prevention in men who have sex with men*. New England Journal of Medicine, 2010(363): p. 2587-99.
2. Mayer, K.H., et al., *Emtricitabine and tenofovir alafenamide vs emtricitabine and tenofovir disoproxil fumarate for HIV pre-exposure prophylaxis (DISCOVER): primary results from a randomised, double-blind, multicentre, active-controlled, phase 3, non-inferiority trial*. The Lancet, 2020. **396**(10246): p. 239-254.
3. Molina, J.M., et al., *On-Demand Preexposure Prophylaxis in Men at High Risk for HIV-1 Infection*. N Engl J Med, 2015. **373**(23): p. 2237-46.
4. Tan, D.H.S., et al., *Trends in HIV pre-exposure prophylaxis uptake in Ontario, Canada, and impact of policy changes: a population-based analysis of projected pharmacy data (2015-2018)*. Can J Public Health, 2021. **112**(1): p. 89-96.
5. Popovic, N., Q. Yang, and C. Archibald, *Trends in HIV pre-exposure prophylaxis use in eight Canadian provinces, 2014-2018*. Can Commun Dis Rep, 2021. **47**(56): p. 251-258.
6. Tan, D.H.S., et al., *Canadian guideline on HIV pre-exposure prophylaxis and nonoccupational postexposure prophylaxis*. CMAJ, 2017. **189**(47): p. E1448-E1458.
7. Tan, D.H., et al. *Estimating the number of gay, bisexual and other men who have sex with men (gbMSM) eligible for HIV preexposure prophylaxis (PrEP) in Ontario*. in *26th Annual Canadian Conference on HIV/AIDS Research*. 2017. Montreal, Quebec.

- 1
  - 2
  - 3
  - 4
  - 5
  - 6
  - 7
  - 8
  - 9
  - 10
  - 11
  - 12
  - 13
  - 14
  - 15
  - 16
  - 17
  - 18
  - 19
  - 20
  - 21
  - 22
  - 23
  - 24
  - 25
  - 26
  - 27
  - 28
  - 29
  - 30
  - 31
  - 32
  - 33
  - 34
  - 35
  - 36
  - 37
  - 38
  - 39
  - 40
  - 41
  - 42
  - 43
  - 44
  - 45
  - 46
  - 47
  - 48
  - 49
  - 50
  - 51
  - 52
  - 53
  - 54
  - 55
  - 56
  - 57
  - 58
  - 59
  - 60
8. Philbin, M.M., et al., *The Promise of Pre-Exposure Prophylaxis for Black Men Who Have Sex with Men: An Ecological Approach to Attitudes, Beliefs, and Barriers*. AIDS Patient Care STDS, 2016. **30**(6): p. 282-90.
9. Zhang, C., et al., *HIV Pre-Exposure Prophylaxis Implementation Cascade Among Health Care Professionals in the United States: Implications from a Systematic Review and Meta-Analysis*. AIDS Patient Care STDS, 2019. **33**(12): p. 507-527.
10. Pleuhs, B., et al., *Health Care Provider Barriers to HIV Pre-Exposure Prophylaxis in the United States: A Systematic Review*. AIDS Patient Care STDS, 2020. **34**(3): p. 111-123.
11. Peng, P., et al., *A Global Estimate of the Acceptability of Pre-exposure Prophylaxis for HIV Among Men Who have Sex with Men: A Systematic Review and Meta-analysis*. AIDS Behav, 2018. **22**(4): p. 1063-1074.
12. Maticotta, J.J., F.J. Rosales-Perez, and C.M. Carrillo, *HIV Preexposure Prophylaxis and Treatment as Prevention - Beliefs and Access Barriers in Men Who Have Sex With Men (MSM) and Transgender Women: A Systematic Review*. J Patient Cent Res Rev, 2020. **7**(3): p. 265-274.
13. Wilton, J., et al., *Use of an HIV-risk screening tool to identify optimal candidates for PrEP scale-up among men who have sex with men in Toronto, Canada: disconnect between objective and subjective HIV risk*. J Int AIDS Soc, 2016. **19**(1): p. 20777.
14. Eaton, L.A., et al., *Stigma and Conspiracy Beliefs Related to Pre-exposure Prophylaxis (PrEP) and Interest in Using PrEP Among Black and White Men and Transgender Women Who Have Sex with Men*. AIDS Behav, 2017. **21**(5): p. 1236-1246.
15. Kimball, D., et al., *Medical Mistrust and the PrEP Cascade Among Latino Sexual Minority Men*. AIDS Behav, 2020. **24**(12): p. 3456-3461.
16. Quinn, K., et al., *"A Gay Man and a Doctor are Just like, a Recipe for Destruction": How Racism and Homonegativity in Healthcare Settings Influence PrEP Uptake Among Young Black MSM*. AIDS Behav, 2019. **23**(7): p. 1951-1963.
17. Kota, K.K., et al., *Sociodemographic Characteristics of HIV Pre-Exposure Prophylaxis Use and Reasons for Nonuse Among Gay, Bisexual, and Other Men Who Have Sex with Men from Three US Cities*. AIDS Patient Care STDS, 2021.
18. Gaspar, M., T. Salway, and D. Grace, *Ambivalence and the biopolitics of HIV pre-exposure prophylaxis (PrEP) implementation*. Soc Theory Health, 2021: p. 1-17.
19. Wight, D., et al., *Six steps in quality intervention development (6SQUID)*. J Epidemiol Community Health, 2016. **70**(5): p. 520-5.
20. Bartholomew, K.L., G.S. Parcel, and G. Kok, *Intervention Mapping: A Process for Developing Theory- and Evidence-Based Health Education Programs*. Health Education & Behavior, 1998. **25**(5): p. 545-563.
21. Campbell, N.C., et al., *Designing and evaluating complex interventions to improve health care*. BMJ, 2007. **334**: p. 455-459.
22. Smith, D.K., et al., *Development of a Clinical Screening Index Predictive of Incident HIV Infection Among Men Who Have Sex With Men in the United States*. J Acquir Immune Defic Syndr, 2012. **60**(4): p. 421-427.
23. Ontario HIV Epidemiology and Surveillance Initiative, *HIV diagnoses in Ontario, 2019*. 2021: Toronto, Ontario.
24. Lelutiu-Weinberger, C. and S.A. Golub, *Enhancing PrEP Access for Black and Latino Men Who Have Sex with Men*. J Acquir Immune Defic Syndr, 2016. **73**(5): p. 547–555.
25. Haddad, N., et al., *HIV in Canada-surveillance report, 2019*. Can Commun Dis Rep, 2021. **47**(1): p. 77-86.

- 1
  - 2
  - 3
  - 4
  - 5
  - 6
  - 7
  - 8
  - 9
  - 10
  - 11
  - 12
  - 13
  - 14
  - 15
  - 16
  - 17
  - 18
  - 19
  - 20
  - 21
  - 22
  - 23
  - 24
  - 25
  - 26
  - 27
  - 28
  - 29
  - 30
  - 31
  - 32
  - 33
  - 34
  - 35
  - 36
  - 37
  - 38
  - 39
  - 40
  - 41
  - 42
  - 43
  - 44
  - 45
  - 46
  - 47
  - 48
  - 49
  - 50
  - 51
  - 52
  - 53
  - 54
  - 55
  - 56
  - 57
  - 58
  - 59
  - 60
26. Kanny, D., et al., *Racial/Ethnic Disparities in HIV Preexposure Prophylaxis Among Men Who Have Sex with Men — 23 Urban Areas, 2017*. MMWR Morb Mortal Wkly Rep, 2019. **68**(37): p. 801-806.
27. Lachowsky, N.J., et al., *Pre-exposure Prophylaxis Awareness Among Gay and Other Men who have Sex with Men in Vancouver, British Columbia, Canada*. AIDS Behav, 2016. **20**(7): p. 1408-22.
28. Community-Based Research Centre. *Sex Now Survey*. 2014; Available from: [https://www.cbrc.net/sex\\_now](https://www.cbrc.net/sex_now).
29. Tang, K.L., W.A. Ghali, and B.J. Manns, *Addressing cost-related barriers to prescription drug use in Canada*. CMAJ, 2014. **186**(4): p. 276-280.
30. British Columbia Centre for Excellence in HIV/AIDS, *Guidance for the use of pre-exposure prophylaxis (PrEP) afor the prevention of HIV acquisition in British Columbia*. 2019. p. 1-20.
31. Alberta Health Services, *Alberta HIV Pre-Exposure Prophylaxis (PrEP) Guidelines*, A.S.O.P.P.W. Group, Editor. 2021. p. 41.
32. Saskatchewan Health Authority. *HIV PrEP*. May 6, 2021]; Available from: <http://www.rqhealth.ca/department/population-and-public-health/hiv-prep>.
33. Government of Yukon. *Preventative human immunodeficiency virus (HIV) prescription coverage coming to Yukon*. 2020 May 6, 2021]; Available from: <https://yukon.ca/en/news/preventative-human-immunodeficiency-virus-hiv-prescription-coverage-coming-yukon>.
34. Mugwanya, K.K. and J.M. Baeten, *Safety of oral tenofovir disoproxil fumarate-based pre-exposure prophylaxis for HIV prevention*. Expert Opin Drug Saf, 2016. **15**(2): p. 265-73.
35. Yacoub, R., et al., *Elevations in Serum Creatinine With Tenofovir-Based HIV Pre-Exposure Prophylaxis: A Meta-Analysis of Randomized Placebo-Controlled Trials*. J Acquir Immune Defic Syndr, 2016. **71**(4): p. e115-8.
36. Solomon, M.M., et al., *Changes in renal function associated with oral emtricitabine/tenofovir disoproxil fumarate use for HIV pre-exposure prophylaxis*. AIDS, 2014. **28**(6): p. 851-9.
37. Glidden, D.V., et al., *Recovery of Bone Mineral Density After Discontinuation of Tenofovir-Based HIV Pre-exposure Prophylaxis*. J Acquir Immune Defic Syndr, 2017. **76**(2): p. 177-182.
38. Siegler, A.J., et al., *Levels of clinical condom failure for anal sex: A randomized cross-over trial*. EClinicalMedicine, 2019. **17**: p. 100199.
39. Wilton, J., S. Mishra, and D.H. Tan, *Considerations for Using the HIRI-MSM Screening Tool to Identify MSM Who Would Benefit Most From PrEP*. J Acquir Immune Defic Syndr, 2017. **76**(2): p. e58-e60.
40. Pico Espinosa, O.J., et al. *First impressions matter: Differences in experiences with first PrEP related healthcare encounters between gay, bisexual and other men who have sex with men (GBM) on PrEP and GBM who discontinued PrEP*. in CAHR. 2022. Online.
41. Sullivan, P.S., et al., *Implementation Strategies to Increase PrEP Uptake in the South*. Curr HIV/AIDS Rep, 2019. **16**(4): p. 259-269.
42. Blumenthal, J., et al., *Perceived Versus Calculated HIV Risk: Implications for Pre-exposure Prophylaxis Uptake in a Randomized Trial of Men Who Have Sex With Men*. J Acquir Immune Defic Syndr, 2019. **80**(2): p. e23-e29.
43. Thrun, M., et al., *Improved prevention counseling by hiv care providers in a Multisite, clinic-based intervention: positive steps*. AIDS Education and Prevention, 2009. **21**(1): p. 55–66.

Figure 1. Flowchart of survey participants.



Confidential

**Table 1.** Sociodemographic characteristics of all the study participants and stratified by province.

|                                 | <b>All</b> |     | <b>Ontario</b> |     | <b>British Columbia</b> |     | <b>p-value</b> |
|---------------------------------|------------|-----|----------------|-----|-------------------------|-----|----------------|
| <b>Age, median(IQR)</b>         | 31 (26-38) |     | 31 (26-37)     |     | 32 (27-40)              |     | 0.405          |
| 19-28                           | 94         | 36% | 68             | 37% | 26                      | 35% |                |
| 29-40                           | 116        | 45% | 85             | 46% | 31                      | 41% |                |
| 41-48                           | 25         | 10% | 15             | 8%  | 10                      | 13% |                |
| >=49                            | 24         | 9%  | 16             | 9%  | 8                       | 11% |                |
| Total                           | 259        |     | 184            |     | 75                      |     |                |
| <b>Sociocultural background</b> |            |     |                |     |                         |     |                |
| White born in Canada            | 123        | 47% | 88             | 48% | 35                      | 46% | 0.044*         |
| White born abroad               | 24         | 9%  | 17             | 9%  | 7                       | 9%  |                |
| Black born in Canada            | 12         | 5%  | 12             | 7%  | 0                       | 0%  |                |
| Black born abroad               | 3          | 1%  | 3              | 2%  | 0                       | 0%  |                |
| East Asian born in Canada       | 6          | 2%  | 2              | 1%  | 4                       | 5%  |                |
| East Asian born abroad          | 16         | 6%  | 7              | 4%  | 9                       | 12% |                |
| Latin born in Canada            | 3          | 1%  | 3              | 2%  | 0                       | 0%  |                |
| Latin born abroad               | 19         | 7%  | 15             | 8%  | 4                       | 5%  |                |
| Indigenous people of Canada     | 8          | 3%  | 5              | 3%  | 3                       | 4%  |                |
| Other born in Canada**          | 20         | 8%  | 15             | 8%  | 5                       | 7%  |                |
| Other born abroad**             | 26         | 10% | 17             | 9%  | 9                       | 12% |                |
| Total                           | 260        |     | 184            |     | 76                      |     |                |
| <b>Ethnicity</b>                |            |     |                |     |                         |     | 0.002*         |
| White                           | 147        | 57% | 105            | 57% | 42                      | 55% |                |
| Black                           | 15         | 6%  | 15             | 8%  | 0                       | 0%  |                |
| Indigenous people of Canada     | 8          | 3%  | 5              | 3%  | 3                       | 4%  |                |
| East Asian                      | 22         | 8%  | 9              | 5%  | 13                      | 17% |                |
| Southeast Asian                 | 18         | 7%  | 9              | 5%  | 9                       | 12% |                |
| South Asian                     | 7          | 3%  | 6              | 3%  | 1                       | 1%  |                |
| Middle Eastern                  | 11         | 4%  | 9              | 5%  | 2                       | 3%  |                |
| Latinx                          | 22         | 8%  | 18             | 10% | 4                       | 5%  |                |
| Others                          | 10         | 4%  | 8              | 4%  | 2                       | 3%  |                |
| Total                           | 260        |     | 184            |     | 76                      |     |                |
| <b>Place of birth</b>           |            |     |                |     |                         |     | 0.345          |
| Born in Canada                  | 172        | 66% | 125            | 68% | 47                      | 62% |                |
| Born outside of Canada          | 88         | 34% | 59             | 32% | 29                      | 38% |                |
| Total                           | 260        |     | 184            |     | 76                      |     |                |
| <b>Education</b>                |            |     |                |     |                         |     |                |
| High school or less             | 27         | 11% | 20             | 11% | 7                       | 9%  | 0.116          |



|                     |     |     |     |     |    |     |  |
|---------------------|-----|-----|-----|-----|----|-----|--|
| College/technical   | 73  | 28% | 46  | 25% | 27 | 36% |  |
| Bachelor's degree   | 102 | 40% | 80  | 44% | 22 | 29% |  |
| Postgraduate degree | 55  | 21% | 36  | 20% | 19 | 25% |  |
| Total               | 257 |     | 182 |     | 75 |     |  |

#### Annual Personal Income (CAD)

|                       |     |     |     |     |    |     |       |
|-----------------------|-----|-----|-----|-----|----|-----|-------|
| 20.000 or less        | 31  | 12% | 24  | 13% | 7  | 9%  | 0.789 |
| 20.001-40.000         | 55  | 21% | 41  | 22% | 14 | 18% |       |
| 40.001-60.000         | 75  | 29% | 50  | 27% | 25 | 33% |       |
| 60.001-80.000         | 44  | 17% | 29  | 16% | 15 | 20% |       |
| More than 80.000      | 37  | 14% | 26  | 14% | 11 | 15% |       |
| Prefers not to answer | 17  | 7%  | 13  | 7%  | 4  | 5%  |       |
| Total                 | 259 |     | 183 |     | 76 |     |       |

#### Gender

|              |     |     |     |     |    |     |        |
|--------------|-----|-----|-----|-----|----|-----|--------|
| Man          | 250 | 97% | 177 | 97% | 73 | 96% | 0.878* |
| Woman        | 4   | 1%  | 3   | 2%  | 1  | 1%  |        |
| Two-Spirit   | 1   | 1%  | 1   | 1%  | 0  | 0%  |        |
| Gender Fluid | 4   | 1%  | 2   | 1%  | 2  | 3%  |        |
| Total        | 259 |     | 183 |     | 76 |     |        |

#### Relationship status

|                       |     |     |     |     |    |     |        |
|-----------------------|-----|-----|-----|-----|----|-----|--------|
| No regular partner    | 125 | 49% | 85  | 47% | 40 | 53% | 0.872* |
| Open relationship     | 93  | 36% | 68  | 38% | 25 | 33% |        |
| Closed relationship   | 29  | 11% | 21  | 12% | 8  | 11% |        |
| Prefers not to answer | 10  | 4%  | 7   | 4%  | 3  | 4%  |        |
| Total                 | 257 |     | 181 |     | 76 |     |        |

#### Primary Care Provider

|                       |     |     |     |     |    |     |        |
|-----------------------|-----|-----|-----|-----|----|-----|--------|
| Yes                   | 163 | 63% | 124 | 67% | 39 | 51% | 0.040* |
| No                    | 90  | 35% | 56  | 30% | 34 | 45% |        |
| Prefers not to answer | 7   | 3%  | 4   | 2%  | 3  | 4%  |        |
| Total                 | 260 |     | 184 |     | 76 |     |        |

#### How pays for medications

|                       |     |     |     |     |    |     |        |
|-----------------------|-----|-----|-----|-----|----|-----|--------|
| Private               | 153 | 59% | 110 | 60% | 43 | 57% | 0.162* |
| IFHP-refugees†        | 1   | 1%  | 0   | 0%  | 1  | 1%  |        |
| NIHB-indigenous‡      | 5   | 2%  | 2   | 1%  | 3  | 4%  |        |
| BC Pharmacare         | 1   | 1%  | 0   | 0%  | 1  | 1%  |        |
| Ontario Drug Benefit  | 20  | 8%  | 17  | 9%  | 3  | 4%  |        |
| Out of pocket         | 71  | 27% | 48  | 26% | 23 | 30% |        |
| Other                 | 1   | 1%  | 1   | 1%  | 0  | 0%  |        |
| Prefers not to answer | 7   | 3%  | 5   | 3%  | 2  | 3%  |        |

1  
2  
3  
4  
5  
6  
7  
8  
9  
10  
11  
12  
13  
14  
15  
16  
17  
18  
19  
20  
21  
22  
23  
24  
25  
26  
27  
28  
29  
30  
31  
32  
33  
34  
35  
36  
37  
38  
39  
40  
41  
42  
43  
44  
45  
46  
47  
48  
49  
50  
51  
52  
53  
54  
55  
56  
57  
58  
59  
60

|       |     |     |    |
|-------|-----|-----|----|
| Total | 259 | 183 | 76 |
|-------|-----|-----|----|

\*Fisher's exact test. †IFHP: Interim Federal Health Program. #NIHB: Non-insured health benefits for First Nations people and Inuit.

Confidential

**Table 2.** HIRI score, STIs, use of PEP and self-perceived risk of HIV for all included study participants and stratified by province. Figures sum to >100% due to many participants meeting multiple criteria.

|                              | <b>All</b> |     | <b>Ontario</b> |     | <b>British Columbia</b> | <b>p-value</b> |
|------------------------------|------------|-----|----------------|-----|-------------------------|----------------|
| <b>HIRI score, mean (SD)</b> | 20.5 (6.5) |     | 21.0 (6.4)     |     | 19.4 (6.6)              | 0.066          |
| Total                        | 260        |     | 184            |     | 76                      |                |
| <b>Syphilis</b>              |            |     |                |     |                         | 0.381          |
| Yes                          | 59         | 30% | 40             | 28% | 19                      | 35%            |
| No                           | 138        | 70% | 102            | 72% | 36                      | 65%            |
| Total                        | 197        |     | 142            |     | 55                      |                |
| <b>Rectal chlamydia</b>      |            |     |                |     |                         | 0.843          |
| Yes                          | 36         | 17% | 25             | 17% | 11                      | 18%            |
| No                           | 173        | 83% | 123            | 83% | 50                      | 82%            |
| Total                        | 209        |     | 148            |     | 61                      |                |
| <b>Rectal gonorrhea</b>      |            |     |                |     |                         | 0.426          |
| Yes                          | 40         | 19% | 31             | 20% | 9                       | 15%            |
| No                           | 174        | 81% | 124            | 80% | 50                      | 85%            |
| Total                        | 214        |     | 155            |     | 59                      |                |
| <b>PEP more than once</b>    |            |     |                |     |                         | 0.413          |
| Yes                          | 15         | 6%  | 12             | 7%  | 3                       | 4%             |
| No                           | 244        | 94% | 171            | 93% | 73                      | 96%            |
| Total                        | 259        |     | 183            |     | 76                      |                |

**Table 3.** Reasons for not using PrEP for all study participants and stratified by province.

|                                          | All |     | Ontario |     | British Columbia |     | p-value |
|------------------------------------------|-----|-----|---------|-----|------------------|-----|---------|
|                                          | n   | %   | n       | %   | n                | %   |         |
| Concern about side effects               | 108 | 41% | 77      | 42% | 31               | 41% | 0.875   |
| Unable to afford it                      | 92  | 35% | 80      | 43% | 12               | 16% | <0.001  |
| Not feeling at high enough risk          | 76  | 29% | 49      | 27% | 27               | 36% | 0.151   |
| Unwillingness to take a pill regularly   | 65  | 25% | 47      | 26% | 18               | 24% | 0.753   |
| Lack of knowledge about where to get it  | 64  | 25% | 48      | 26% | 16               | 21% | 0.391   |
| Lack of protection against other STIs    | 50  | 19% | 36      | 20% | 14               | 18% | 0.831   |
| Consistent condom use for anal sex       | 33  | 13% | 20      | 11% | 13               | 17% | 0.17    |
| Concern about what others would think    | 32  | 12% | 25      | 14% | 7                | 9%  | 0.329   |
| No particular reason                     | 22  | 8%  | 17      | 9%  | 5                | 7%  | 0.483   |
| Other*                                   | 18  | 7%  | 9       | 5%  | 9                | 12% | 0.045   |
| Belief that PrEP is not effective enough | 11  | 4%  | 8       | 4%  | 3                | 4%  | 0.884   |
| The HCP wouldn't prescribe it            | 10  | 4%  | 5       | 3%  | 5                | 7%  | 0.141   |
| Lack of interest                         | 8   | 3%  | 5       | 3%  | 3                | 4%  | 0.601   |
| Total participants                       | 260 |     | 184     |     | 76               |     |         |

\*Other reasons included: the process to getting PrEP is too complicated, busy schedule, no or infrequent anal sex, being monogamous, privacy issues, being told that they are not at high enough risk, among others.

**Table 4.** Strategies that ~~might~~ would more likely influence the decision to start PrEP for all participants and stratified by province.

| Strategies that might influence the decision to start PrEP | All participants |     |                          |     | Ontario     |     |                          |     | British Columbia |     |                          |     | p-value |
|------------------------------------------------------------|------------------|-----|--------------------------|-----|-------------|-----|--------------------------|-----|------------------|-----|--------------------------|-----|---------|
|                                                            | More likely      |     | No change or less likely |     | More likely |     | No change or less likely |     | More likely      |     | No change or less likely |     |         |
| Short waiting time to PrEP appointment                     | 160              | 65% | 88                       | 35% | 114         | 63% | 66                       | 37% | 46               | 68% | 22                       | 32% | 0.526   |
| HCP informing about being at higher risk than perceived    | 155              | 63% | 92                       | 37% | 111         | 62% | 67                       | 38% | 44               | 64% | 25                       | 36% | 0.837   |
| Written step-by-step guide                                 | 152              | 61% | 99                       | 39% | 109         | 60% | 72                       | 40% | 43               | 61% | 27                       | 39% | 0.861   |
| People speaking publicly about PrEP                        | 147              | 59% | 101                      | 41% | 101         | 56% | 79                       | 44% | 46               | 68% | 22                       | 32% | 0.099   |
| HCP informing about how well PrEP works                    | 144              | 58% | 103                      | 42% | 101         | 57% | 77                       | 43% | 43               | 62% | 26                       | 38% | 0.425   |
| Help finding publicly funded PrEP                          | 142              | 57% | 106                      | 43% | 103         | 58% | 76                       | 42% | 39               | 57% | 30                       | 43% | 0.884   |
| A list of PrEP providers                                   | 140              | 57% | 107                      | 43% | 99          | 56% | 79                       | 44% | 41               | 59% | 28                       | 41% | 0.588   |
| HCP counselling about side effects                         | 136              | 55% | 112                      | 45% | 92          | 51% | 88                       | 49% | 44               | 65% | 24                       | 35% | 0.055   |
| People disclosing their PrEP use on apps                   | 138              | 55% | 111                      | 45% | 97          | 54% | 84                       | 46% | 41               | 60% | 27                       | 40% | 0.343   |
| A navigator to find providers                              | 128              | 51% | 121                      | 49% | 91          | 51% | 88                       | 49% | 37               | 53% | 33                       | 47% | 0.774   |
| An online program to calculate risk                        | 124              | 50% | 123                      | 50% | 90          | 51% | 88                       | 49% | 34               | 49% | 35                       | 51% | 0.856   |
| A publicity campaign promoting PrEP                        | 118              | 48% | 129                      | 52% | 84          | 47% | 96                       | 53% | 34               | 51% | 33                       | 49% | 0.568   |
| Information to bring to their HCP                          | 94               | 38% | 151                      | 62% | 60          | 34% | 117                      | 66% | 34               | 50% | 34                       | 50% | 0.020   |

**Table S1 and S2.** Reasons for not using PrEP stratified by level of formal education and sociocultural background and by ethnicity.

| Reasons for not using PrEP               | Less than Bachelor's |     | More than Bachelor's |     | p-value | Non-white and white born outside Canada |     | White born in Canada |     | p-value |
|------------------------------------------|----------------------|-----|----------------------|-----|---------|-----------------------------------------|-----|----------------------|-----|---------|
|                                          | n                    | %   | n                    | %   |         | n                                       | %   | n                    | %   |         |
| Concern about side effects               | 43                   | 43% | 65                   | 41% | 0.755   | 60                                      | 43% | 48                   | 39% | 0.466   |
| Unable to afford it                      | 43                   | 43% | 49                   | 31% | 0.049   | 48                                      | 35% | 44                   | 36% | 0.867   |
| Unwillingness to take a pill regularly   | 25                   | 25% | 40                   | 25% | 0.964   | 32                                      | 23% | 33                   | 27% | 0.497   |
| Lack of knowledge about where to get it  | 25                   | 25% | 39                   | 24% | 0.945   | 32                                      | 23% | 32                   | 26% | 0.596   |
| Not feeling at high enough risk          | 21                   | 21% | 55                   | 34% | 0.019   | 35                                      | 25% | 41                   | 33% | 0.157   |
| Consistent condom use for anal sex       | 16                   | 16% | 17                   | 11% | 0.217   | 17                                      | 12% | 16                   | 13% | 0.867   |
| Lack of protection against other STIs    | 14                   | 14% | 36                   | 23% | 0.084   | 27                                      | 20% | 23                   | 19% | 0.859   |
| No particular reason                     | 12                   | 12% | 10                   | 6%  | 0.111   | 9                                       | 7%  | 13                   | 11% | 0.24    |
| Concern about what others would think    | 8                    | 8%  | 24                   | 15% | 0.089   | 16                                      | 12% | 16                   | 13% | 0.728   |
| The HCP wouldn't prescribe it            | 5                    | 5%  | 5                    | 3%  | 0.454   | 6                                       | 4%  | 4                    | 3%  | 0.645   |
| Belief that PrEP is not effective enough | 4                    | 4%  | 7                    | 4%  | 0.871   | 5                                       | 4%  | 6                    | 5%  | 0.614   |
| Other                                    | 3                    | 3%  | 15                   | 9%  | 0.047   | 9                                       | 7%  | 9                    | 7%  | 0.8     |
| Lack of interest                         | 2                    | 2%  | 6                    | 4%  | 0.419   | 6                                       | 4%  | 2                    | 2%  | 0.203   |

| Reasons for not using PrEP               | White    | Black   | Indigenous | East Asian | South East Asian | South Asian | Middle Eastern | Latinx   | Other   | p-value |
|------------------------------------------|----------|---------|------------|------------|------------------|-------------|----------------|----------|---------|---------|
|                                          |          |         |            |            |                  |             |                |          |         |         |
| Unable to afford it                      | 52 (35%) | 5 (33%) | 1 (13%)    | 4 (18%)    | 3 (17%)          | 4 (57%)     | 6 (55%)        | 12 (55%) | 5 (50%) | 0.052   |
| Unwillingness to take a pill regularly   | 43 (29%) | 5 (33%) | 1 (13%)    | 6 (27%)    | 0 (0%)           | 2 (29%)     | 1 (9%)         | 5 (23%)  | 2 (20%) | 0.148   |
| Lack of knowledge about where to get it  | 37 (25%) | 4 (27%) | 1 (13%)    | 6 (27%)    | 5 (28%)          | 2 (29%)     | 2 (18%)        | 4 (18%)  | 3 (30%) | 0.989   |
| Not feeling at high enough risk          | 50 (34%) | 2 (13%) | 2 (25%)    | 8 (36%)    | 4 (22%)          | 1 (14%)     | 4 (36%)        | 4 (18%)  | 1 (10%) | 0.435   |
| Consistent condom use for anal sex       | 21 (14%) | 4 (27%) | 1 (13%)    | 2 (9%)     | 3 (17%)          | 1 (14%)     | 0 (0%)         | 1 (5%)   | 0 (0%)  | 0.486   |
| Lack of protection against other STIs    | 31 (21%) | 2 (13%) | 3 (38%)    | 5 (23%)    | 2 (11%)          | 1 (14%)     | 1 (9%)         | 3 (14%)  | 2 (20%) | 0.856   |
| No particular reason                     | 18 (12%) | 0 (0%)  | 1 (13%)    | 0 (0%)     | 0 (0%)           | 0 (0%)      | 0 (0%)         | 2 (9%)   | 1 (10%) | 0.360   |
| Concern about what others would think    | 19 (13%) | 3 (20%) | 3 (38%)    | 1 (5%)     | 1 (6%)           | 2 (29%)     | 0 (0%)         | 1 (5%)   | 2 (20%) | 0.113   |
| The HCP wouldn't prescribe it            | 6 (4%)   | 0 (0%)  | 0 (0%)     | 1 (5%)     | 0 (0%)           | 1 (14%)     | 0 (0%)         | 2 (9%)   | 0 (0%)  | 0.622   |
| Belief that PrEP is not effective enough | 6 (4%)   | 1 (7%)  | 0 (0%)     | 2 (9%)     | 1 (6%)           | 1 (14%)     | 0 (0%)         | 0 (0%)   | 0 (0%)  | 0.542   |
| Other                                    | 11 (7%)  | 1 (7%)  | 0 (0%)     | 2 (9%)     | 3 (17%)          | 0 (0%)      | 1 (9%)         | 0 (0%)   | 0 (0%)  | 0.658   |

Lack of interest 5 (3%) 0 (0%) 0 (0%) 1 (5%) 0 (0%) 1 (14%) 1 (9%) 0 (0%) 0 (0%) 0.483

**Table S3 and S4.** Strategies that might influence the decision to start PrEP stratified by level of formal education and sociocultural background and by ethnicity.

| Strategies that might influence the decision to start PrEP | Less than Bachelor's |                          |             |                          | Bachelor's degree or higher |                          |             |                          | p-value | Non-white and white born outside Canada |                          |             |                          | White born in Canada |                          |    |     | p-value |
|------------------------------------------------------------|----------------------|--------------------------|-------------|--------------------------|-----------------------------|--------------------------|-------------|--------------------------|---------|-----------------------------------------|--------------------------|-------------|--------------------------|----------------------|--------------------------|----|-----|---------|
|                                                            | More likely          | No change or less likely | More likely | No change or less likely | More likely                 | No change or less likely | More likely | No change or less likely |         | More likely                             | No change or less likely | More likely | No change or less likely | More likely          | No change or less likely |    |     |         |
| Short waiting time to PrEP appointment                     | 53                   | 56%                      | 42          | 44%                      | 107                         | 70%                      | 46          | 30%                      | 0.024   | 87                                      | 66%                      | 44          | 34%                      | 73                   | 62%                      | 44 | 38% | 0.509   |
| Written step-by-step guide                                 | 52                   | 54%                      | 45          | 46%                      | 100                         | 65%                      | 54          | 35%                      | 0.074   | 84                                      | 62%                      | 51          | 38%                      | 68                   | 59%                      | 48 | 41% | 0.561   |
| A navigator to find providers                              | 52                   | 54%                      | 45          | 46%                      | 76                          | 50%                      | 76          | 50%                      | 0.579   | 74                                      | 55%                      | 60          | 45%                      | 54                   | 47%                      | 61 | 53% | 0.193   |
| HCP informing about being at higher risk than perceived    | 49                   | 52%                      | 45          | 48%                      | 106                         | 69%                      | 47          | 31%                      | 0.007   | 90                                      | 68%                      | 43          | 32%                      | 65                   | 57%                      | 49 | 43% | 0.084   |
| HCP informing about how well PrEP works                    | 49                   | 52%                      | 45          | 48%                      | 95                          | 62%                      | 58          | 38%                      | 0.123   | 81                                      | 61%                      | 52          | 39%                      | 63                   | 55%                      | 51 | 45% | 0.37    |
| People speaking publicly about PrEP                        | 49                   | 52%                      | 45          | 48%                      | 98                          | 64%                      | 56          | 36%                      | 0.074   | 81                                      | 61%                      | 52          | 39%                      | 66                   | 57%                      | 49 | 43% | 0.575   |
| People disclosing their PrEP use on apps                   | 49                   | 52%                      | 46          | 48%                      | 89                          | 58%                      | 65          | 42%                      | 0.338   | 77                                      | 57%                      | 58          | 43%                      | 61                   | 54%                      | 53 | 46% | 0.577   |
| Help finding publicly funded PrEP                          | 44                   | 47%                      | 50          | 53%                      | 98                          | 64%                      | 56          | 36%                      | 0.009   | 83                                      | 62%                      | 50          | 38%                      | 59                   | 51%                      | 56 | 49% | 0.078   |
| HCP counselling about side effects                         | 44                   | 47%                      | 50          | 53%                      | 92                          | 60%                      | 62          | 40%                      | 0.047   | 83                                      | 62%                      | 50          | 38%                      | 53                   | 46%                      | 62 | 54% | 0.01    |
| A list of PrEP providers                                   | 45                   | 46%                      | 52          | 54%                      | 95                          | 63%                      | 55          | 37%                      | 0.009   | 76                                      | 58%                      | 55          | 42%                      | 64                   | 55%                      | 52 | 45% | 0.653   |
| An online program to calculate risk                        | 41                   | 44%                      | 53          | 56%                      | 83                          | 54%                      | 70          | 46%                      | 0.105   | 76                                      | 57%                      | 58          | 43%                      | 48                   | 42%                      | 65 | 58% | 0.026   |
| A publicity campaign promoting PrEP                        | 41                   | 43%                      | 54          | 57%                      | 77                          | 51%                      | 75          | 49%                      | 0.251   | 68                                      | 51%                      | 65          | 49%                      | 50                   | 44%                      | 64 | 56% | 0.254   |
| Information to bring to their HCP                          | 31                   | 33%                      | 64          | 67%                      | 63                          | 42%                      | 87          | 58%                      | 0.142   | 59                                      | 44%                      | 74          | 56%                      | 35                   | 31%                      | 77 | 69% | 0.036   |

| Strategies that might influence the decision to start PrEP | White    | Black   | Indigenous | East Asian | South East Asian | South Asian | Middle Eastern | Latinx   | Other   | p-value |
|------------------------------------------------------------|----------|---------|------------|------------|------------------|-------------|----------------|----------|---------|---------|
| Short waiting time to PrEP appointment                     | 89 (64%) | 9 (64%) | 4 (67%)    | 14 (67%)   | 13 (72%)         | 6 (86%)     | 5 (45%)        | 15 (71%) | 5 (50%) | 0.781   |
| Written step-by-step guide                                 | 83 (59%) | 9 (64%) | 4 (57%)    | 12 (55%)   | 14 (78%)         | 3 (43%)     | 7 (64%)        | 15 (68%) | 5 (50%) | 0.780   |
| A navigator to find providers                              | 67 (48%) | 7 (50%) | 3 (43%)    | 15 (68%)   | 12 (67%)         | 4 (57%)     | 3 (27%)        | 12 (57%) | 5 (50%) | 0.445   |

|    |                                                         |          |          |         |          |          |         |         |          |         |       |
|----|---------------------------------------------------------|----------|----------|---------|----------|----------|---------|---------|----------|---------|-------|
| 1  | HCP informing about being at higher risk than perceived | 83 (61%) | 11 (73%) | 2 (29%) | 16 (73%) | 13 (72%) | 5 (71%) | 7 (64%) | 13 (65%) | 5 (50%) | 0.570 |
| 2  | HCP informing about how well PrEP works                 | 75 (55%) | 9 (60%)  | 2 (29%) | 17 (77%) | 13 (72%) | 4 (57%) | 4 (36%) | 14 (67%) | 6 (60%) | 0.227 |
| 3  | People speaking publicly about PrEP                     | 81 (59%) | 6 (40%)  | 4 (57%) | 14 (64%) | 13 (76%) | 3 (43%) | 6 (60%) | 14 (64%) | 6 (60%) | 0.698 |
| 4  | People disclosing their PrEP use on apps                | 74 (54%) | 7 (47%)  | 5 (71%) | 13 (59%) | 14 (78%) | 4 (57%) | 5 (45%) | 13 (59%) | 3 (30%) | 0.413 |
| 5  | Help finding publicly funded PrEP                       | 75 (54%) | 6 (46%)  | 3 (43%) | 17 (77%) | 12 (71%) | 6 (86%) | 5 (45%) | 14 (64%) | 4 (40%) | 0.188 |
| 6  | HCP counselling about side effects                      | 68 (49%) | 8 (53%)  | 1 (17%) | 15 (71%) | 14 (82%) | 6 (86%) | 6 (55%) | 12 (55%) | 6 (60%) | 0.042 |
| 8  | A list of PrEP providers                                | 77 (55%) | 9 (64%)  | 2 (29%) | 15 (68%) | 10 (59%) | 5 (71%) | 6 (60%) | 11 (52%) | 5 (56%) | 0.805 |
| 9  | An online program to calculate risk                     | 60 (44%) | 8 (53%)  | 3 (43%) | 9 (41%)  | 13 (72%) | 6 (86%) | 7 (64%) | 14 (67%) | 4 (40%) | 0.095 |
| 10 | A publicity campaign promoting PrEP                     | 59 (43%) | 8 (53%)  | 5 (71%) | 11 (50%) | 12 (71%) | 4 (57%) | 4 (36%) | 11 (52%) | 4 (40%) | 0.457 |
| 11 | Information to bring to their HCP                       | 39 (29%) | 9 (60%)  | 3 (43%) | 10 (48%) | 11 (61%) | 4 (67%) | 3 (27%) | 14 (64%) | 1 (11%) | 0.001 |

13  
14  
15

16 Appendix 1. Survey questions.

17  
18 Were any of the following part of the reason that you have never used PrEP? (check all that apply)

- 19 •  I'm worried about side effects
- 20 •  I didn't know where to get it
- 21 •  I couldn't afford the medication cost
- 22 •  I was diagnosed with HIV
- 23 •  The healthcare provider I went to would not prescribe it to me
- 24 •  I didn't feel I was at high enough risk for HIV
- 25 •  I was worried about what others would think about me taking PrEP
- 26 •  I don't think it is effective enough at preventing HIV
- 27 •  It does not prevent other STIs
- 28 •  I don't want to take a pill regularly
- 29 •  I always use condoms for anal sex
- 30 •  I can't be bothered
- 31 •  No, there is no particular reason that I have never used PrEP
- 32 •  Other reason (describe): \_\_\_\_\_

33  
34  
35  
36  
37  
38  
39 How would each of these things change how likely you are to go onto PrEP?

40  
41  
42  
43  
44  
45  
46  
47

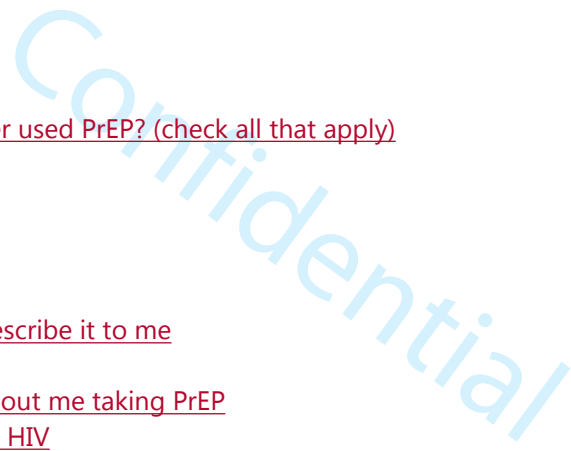



|    | <b><u>This would make<br/>me LESS likely to<br/>go on PrEP</u></b> | <b><u>This would not<br/>change how likely<br/>I am to go on PrEP</u></b> | <b><u>This would make<br/>me MORE likely to<br/>go on PrEP</u></b> |
|----|--------------------------------------------------------------------|---------------------------------------------------------------------------|--------------------------------------------------------------------|
| 1  |                                                                    |                                                                           |                                                                    |
| 2  |                                                                    |                                                                           |                                                                    |
| 3  |                                                                    |                                                                           |                                                                    |
| 4  | <u>a. Information I could bring to my doctor to help</u>           | <input type="radio"/>                                                     | <input type="radio"/>                                              |
| 5  | <u>them learn about PrEP.</u>                                      |                                                                           |                                                                    |
| 6  | <u>b. A list of other providers in my area that prescribe</u>      | <input type="radio"/>                                                     | <input type="radio"/>                                              |
| 7  | <u>PrEP.</u>                                                       |                                                                           |                                                                    |
| 8  | <u>c. A short waiting time for my first PrEP</u>                   | <input type="radio"/>                                                     | <input type="radio"/>                                              |
| 9  | <u>appointment.</u>                                                |                                                                           |                                                                    |
| 10 | <u>d. A written step-by-step guide to going onto PrEP.</u>         | <input type="radio"/>                                                     | <input type="radio"/>                                              |
| 11 | <u>e. Someone working with me to find a provider that</u>          | <input type="radio"/>                                                     | <input type="radio"/>                                              |
| 12 | <u>prescribes PrEP.</u>                                            |                                                                           |                                                                    |
| 13 | <u>f. Someone working with me to access the publicly</u>           | <input type="radio"/>                                                     | <input type="radio"/>                                              |
| 14 | <u>funded PrEP program in my province.</u>                         |                                                                           |                                                                    |
| 15 | <u>g. An online program that allows me to calculate</u>            | <input type="radio"/>                                                     | <input type="radio"/>                                              |
| 16 | <u>my risk of HIV.</u>                                             |                                                                           |                                                                    |
| 17 | <u>h. A healthcare provider telling me that my risk for</u>        | <input type="radio"/>                                                     | <input type="radio"/>                                              |
| 18 | <u>HIV is higher than I thought.</u>                               |                                                                           |                                                                    |
| 19 | <u>i. A healthcare provider counselling me in detail</u>           | <input type="radio"/>                                                     | <input type="radio"/>                                              |
| 20 | <u>about how well PrEP works.</u>                                  |                                                                           |                                                                    |
| 21 | <u>j. A healthcare provider counselling me in detail</u>           | <input type="radio"/>                                                     | <input type="radio"/>                                              |
| 22 | <u>about the risk of PrEP side effects.</u>                        |                                                                           |                                                                    |
| 23 | <u>k. A publicity campaign in my community</u>                     | <input type="radio"/>                                                     | <input type="radio"/>                                              |
| 24 | <u>promoting PrEP as a responsible choice.</u>                     |                                                                           |                                                                    |
| 25 | <u>l. More people in my community speaking publicly</u>            | <input type="radio"/>                                                     | <input type="radio"/>                                              |
| 26 | <u>about their experiences taking PrEP.</u>                        |                                                                           |                                                                    |
| 27 | <u>m. More people on social media and hookup apps</u>              | <input type="radio"/>                                                     | <input type="radio"/>                                              |
| 28 | <u>disclosing that they are on PrEP.</u>                           |                                                                           |                                                                    |
| 29 |                                                                    |                                                                           |                                                                    |
| 30 |                                                                    |                                                                           |                                                                    |
| 31 |                                                                    |                                                                           |                                                                    |
| 32 |                                                                    |                                                                           |                                                                    |
| 33 |                                                                    |                                                                           |                                                                    |
| 34 |                                                                    |                                                                           |                                                                    |
| 35 |                                                                    |                                                                           |                                                                    |
| 36 |                                                                    |                                                                           |                                                                    |
| 37 |                                                                    |                                                                           |                                                                    |
| 38 |                                                                    |                                                                           |                                                                    |
| 39 |                                                                    |                                                                           |                                                                    |
| 40 |                                                                    |                                                                           |                                                                    |
| 41 |                                                                    |                                                                           |                                                                    |
| 42 |                                                                    |                                                                           |                                                                    |
| 43 |                                                                    |                                                                           |                                                                    |
| 44 |                                                                    |                                                                           |                                                                    |
| 45 |                                                                    |                                                                           |                                                                    |
| 46 |                                                                    |                                                                           |                                                                    |
| 47 |                                                                    |                                                                           |                                                                    |

Confidential

1  
2  
3 **Reasons for not using HIV PrEP and strategies that may facilitate HIV PrEP uptake in Ontario and British**  
4 **Columbia among gay, bisexual and other men who have sex with men**  
5  
6  
7

8 **AUTHORS**  
9

10 Oscar Javier Pico-Espinosa, MD PhD, **St Michael's Hospital, Toronto, ON, Canada**

11 Mark Hull, MD MHSc FRCPC, **BC Centre for Excellence in HIV/AIDS, Vancouver, BC, Canada, University of**  
12 **British Columbia, Vancouver, BC, Canada.**

13 Paul MacPherson MD FRCPC PhD, **University of Ottawa, Ottawa, ON, Canada**

14 Daniel Grace PhD, **University of Toronto, Toronto, ON, Canada**

15 Nathan Lachowsky, PhD, **University of Victoria, Victoria, BC, Canada**

16 Mark Gaspar PhD, **University of Toronto, Toronto, ON, Canada**

17 Saira Mohammed BHE MSc CCRP, **BC Centre for Excellence in HIV/AIDS, Vancouver, BC, Canada**

18 Robinson Truong BSc, **St Michael's Hospital, Toronto, ON, Canada**

19 Darrell H. S. Tan MD FRCPC PhD, **St Michael's Hospital, Toronto, ON, Canada**  
20  
21

22  
23 **Corresponding author**  
24

25 Oscar Javier Pico-Espinosa

26 Oscarjavier.picoespinosa@unityhealth.to

27 Li Ka Shing Knowledge Institute, St. Michael's Hospital.

28 209 Victoria Street, Toronto

29 M5B 1R7, ON  
30  
31

32 **Study type:** survey, cross-sectional  
33

34 **Funding:** This project received funding from the Canadian Institutes of Health Research (CIHR). DHST is supported  
35 by a Tier 2 Canada Research Chair in HIV Prevention and STI Research.  
36

37 **Author contributions:** OJPE analyzed the data and led the writing of the manuscript. DHST is the principal  
38 investigator of the PRIMP study. DHST, MH, PM, DC and NL planned the study rollout. SM and RT coordinated the  
39 data collection. MG analyzed qualitative component of the PRIMP study and gave input for the interpretation of  
40 the data. All authors reviewed the various versions of the manuscripts and provided feedback.  
41  
42  
43  
44  
45  
46  
47  
48  
49  
50  
51  
52  
53  
54  
55  
56  
57  
58  
59  
60
